# Supplementary material for: Trigonal scaffolds for multivalent targeting of melanocortin receptors
Source: Royal Society of Chemistry journal article supplement (doi:10.1039/c4ob02094d), 2014-12-03
Supplement: c4ob02094d1.pdf [file c4ob02094d1.pdf]

## Trigonal Scaffolds for Multivalent Targeting of Melanocortin Receptors

N. G. R. Dayan Elshan,<sup>a</sup> Thanuja Jayasundera,<sup>b</sup> Bobbi L. Anglin,<sup>a</sup> Craig S. Weber,<sup>b</sup> Ronald M. Lynch,<sup>b,c</sup> and Eugene A. Mash<sup>\*a</sup>

<sup>a</sup>Department of Chemistry and Biochemistry, University of Arizona, Tucson, Arizona 85721-0041 USA.

<sup>b</sup>Department of Physiology, University of Arizona, Tucson, Arizona 85724-5051 USA.

<sup>c</sup>The Bio5 Institute, University of Arizona, Tucson, Arizona 85721-0240 USA.

### Electronic Supplementary Information

|               |                                            |               |                                                                                               |
|---------------|--------------------------------------------|---------------|-----------------------------------------------------------------------------------------------|
| Page S1.....  | Table of Contents                          | Page S19..... | <sup>1</sup> H-NMR Spectrum of <b>15c</b>                                                     |
| Page S2.....  | <sup>1</sup> H-NMR Spectrum of <b>10</b>   | Page S20..... | <sup>13</sup> C-NMR Spectrum of <b>15c</b>                                                    |
| Page S3.....  | <sup>13</sup> C-NMR Spectrum of <b>10</b>  | Page S21..... | HPLC Chromatogram of <b>16a</b>                                                               |
| Page S4.....  | <sup>1</sup> H-NMR Spectrum of <b>11</b>   | Page S22..... | HPLC Chromatogram of <b>16b</b>                                                               |
| Page S5.....  | <sup>13</sup> C-NMR Spectrum of <b>11</b>  | Page S23..... | HPLC Chromatogram of <b>16c</b>                                                               |
| Page S6.....  | <sup>1</sup> H-NMR Spectrum of <b>12a</b>  | Page S24..... | <sup>1</sup> H-NMR Spectrum of <b>17</b>                                                      |
| Page S7.....  | <sup>13</sup> C-NMR Spectrum of <b>12a</b> | Page S25..... | <sup>13</sup> C-NMR Spectrum of <b>17</b>                                                     |
| Page S8.....  | <sup>1</sup> H-NMR Spectrum of <b>12b</b>  | Page S26..... | HPLC Chromatogram of <b>18</b>                                                                |
| Page S9.....  | <sup>13</sup> C-NMR Spectrum of <b>12b</b> | Page S27..... | Molecular Dynamics Studies                                                                    |
| Page S10..... | <sup>1</sup> H-NMR Spectrum of <b>12c</b>  | Page S28..... | Protein Assay for<br>Fluorescence Normalization                                               |
| Page S11..... | <sup>13</sup> C-NMR Spectrum of <b>12c</b> | Page S29..... | Fluorescence Normalized<br>Competition Binding Curves                                         |
| Page S12..... | HPLC Chromatogram of <b>14a</b>            | Page S31..... | <i>K<sub>i</sub></i> Values Based on<br>Fluorescence Normalized<br>Competition Binding Curves |
| Page S13..... | HPLC Chromatogram of <b>14b</b>            | Page S32..... | Data Analysis for the Binding<br>Assays                                                       |
| Page S14..... | HPLC Chromatogram of <b>14c</b>            |               |                                                                                               |
| Page S15..... | <sup>1</sup> H-NMR Spectrum of <b>15a</b>  |               |                                                                                               |
| Page S16..... | <sup>13</sup> C-NMR Spectrum of <b>15a</b> |               |                                                                                               |
| Page S17..... | <sup>1</sup> H-NMR Spectrum of <b>15b</b>  |               |                                                                                               |
| Page S18..... | <sup>13</sup> C-NMR Spectrum of <b>15b</b> |               |                                                                                               |

\* Corresponding author. Tel.: +1 520 621 6321; FAX +1 520 621 8407, *E-mail address:*  
[emash@email.arizona.edu](mailto:emash@email.arizona.edu).

$^1\text{H}$ -NMR Spectrum of 10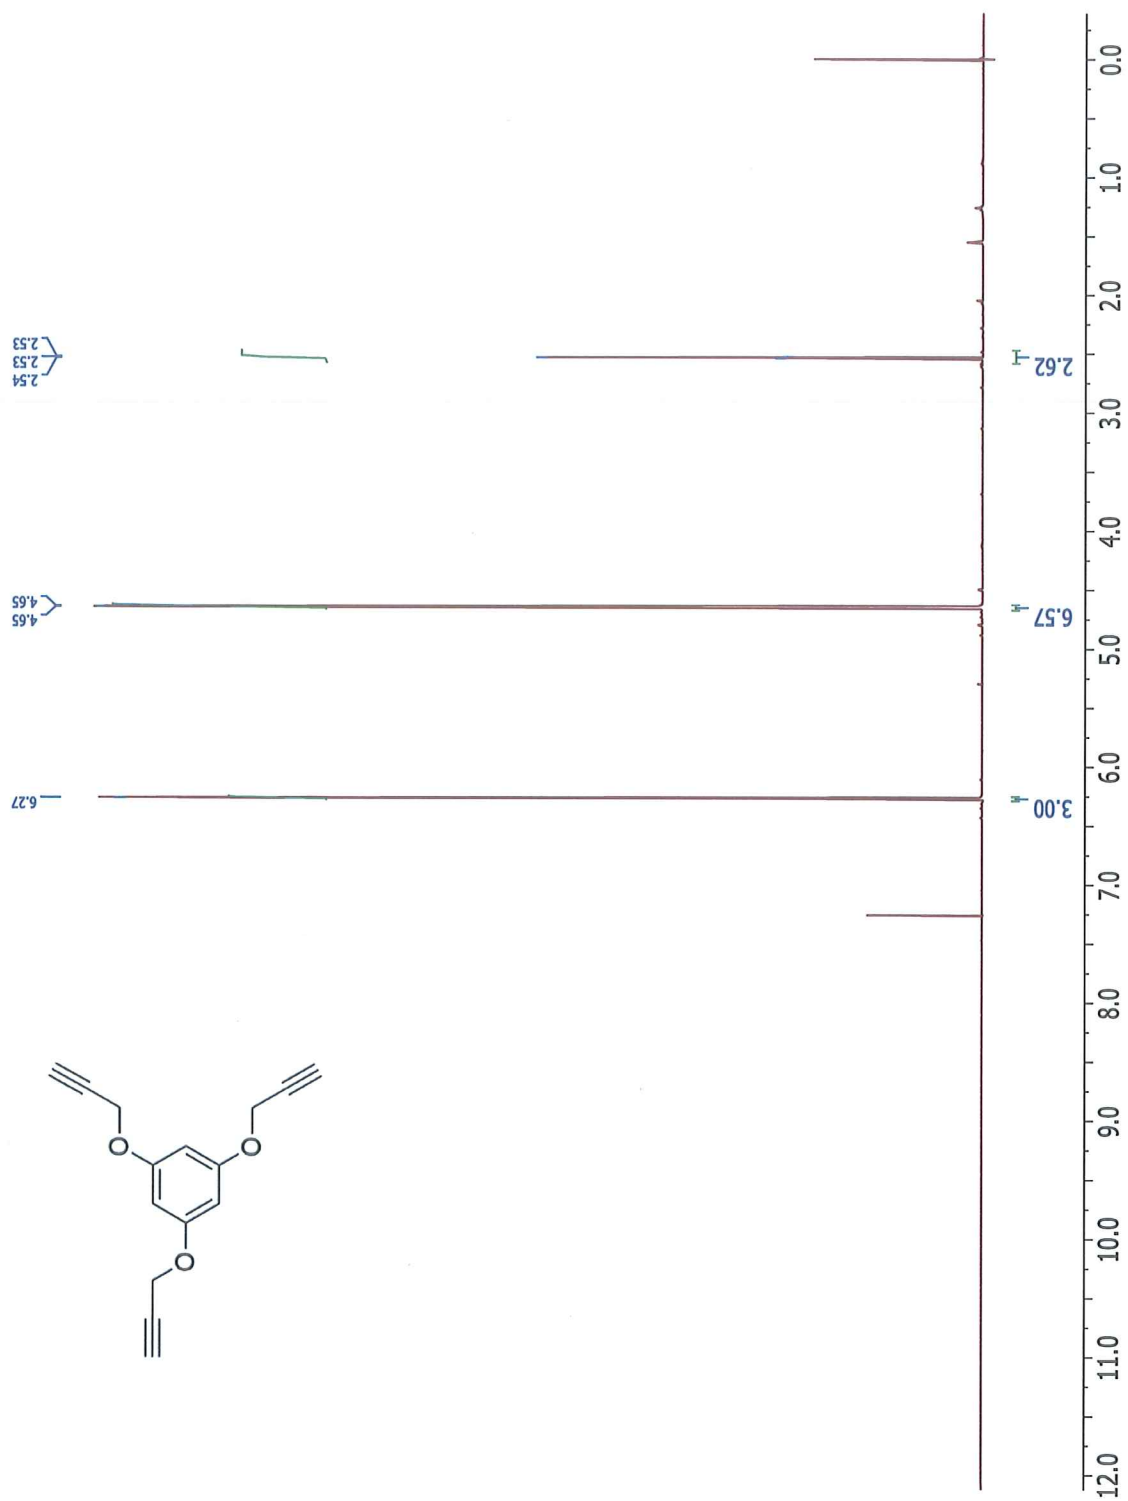

$^{13}\text{C}$ -NMR Spectrum of 10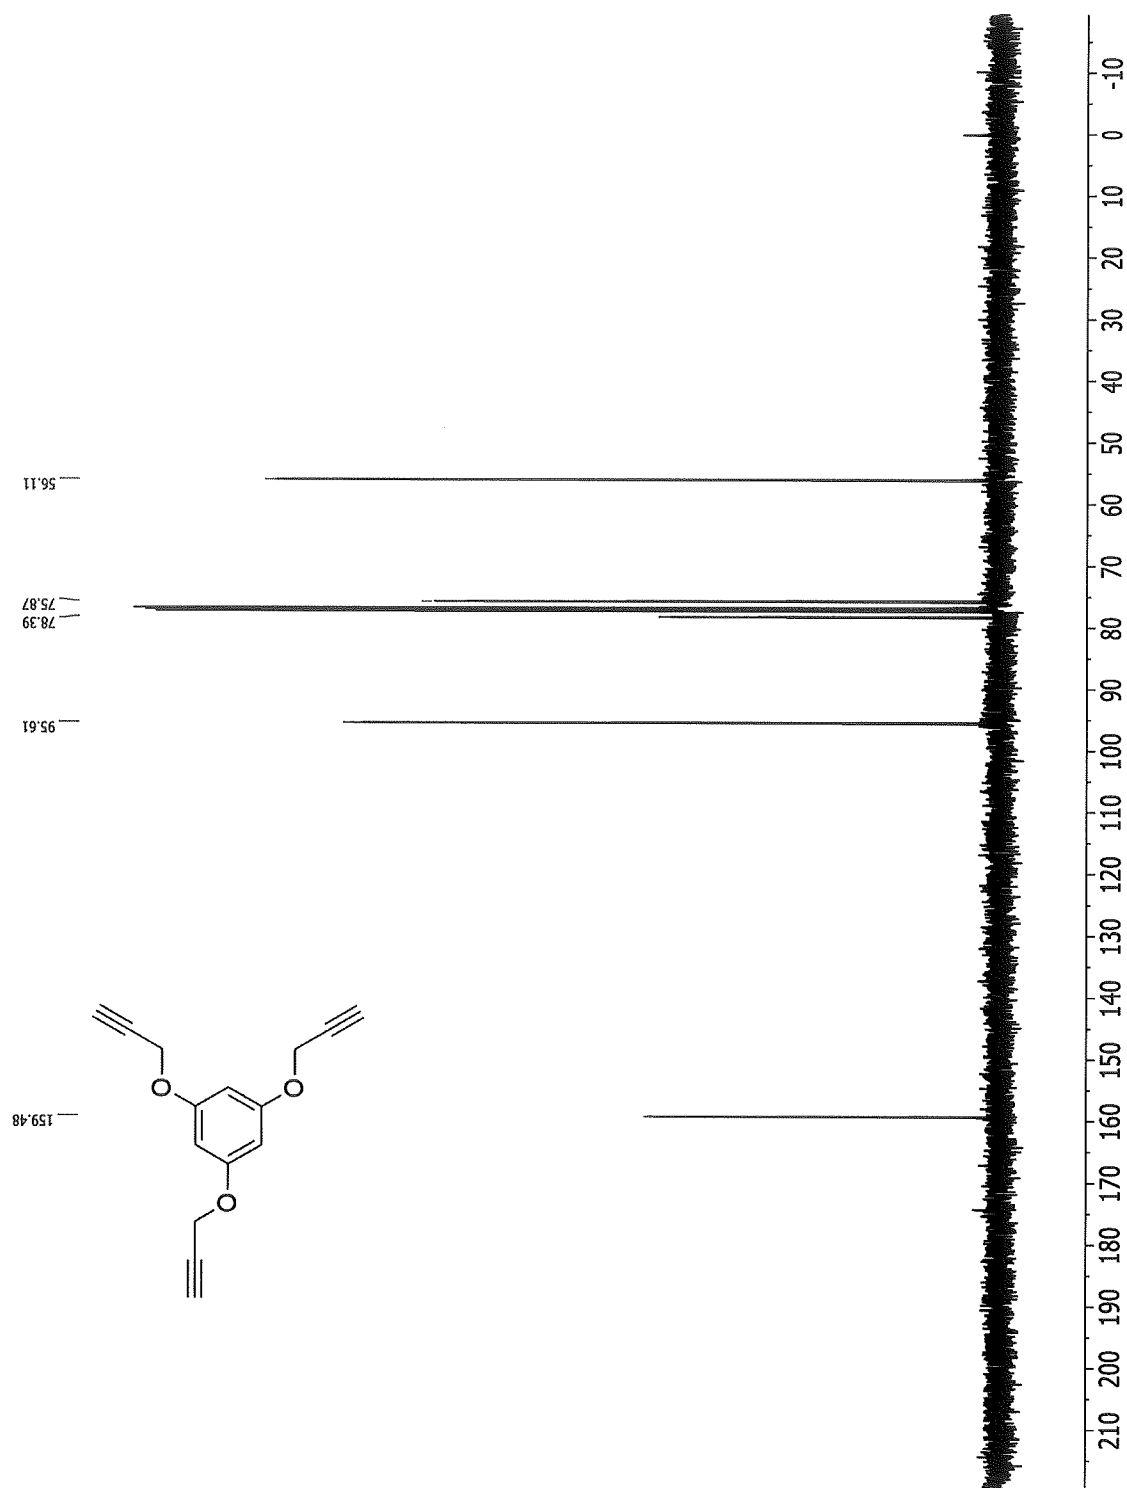

$^1\text{H}$ -NMR Spectrum of 11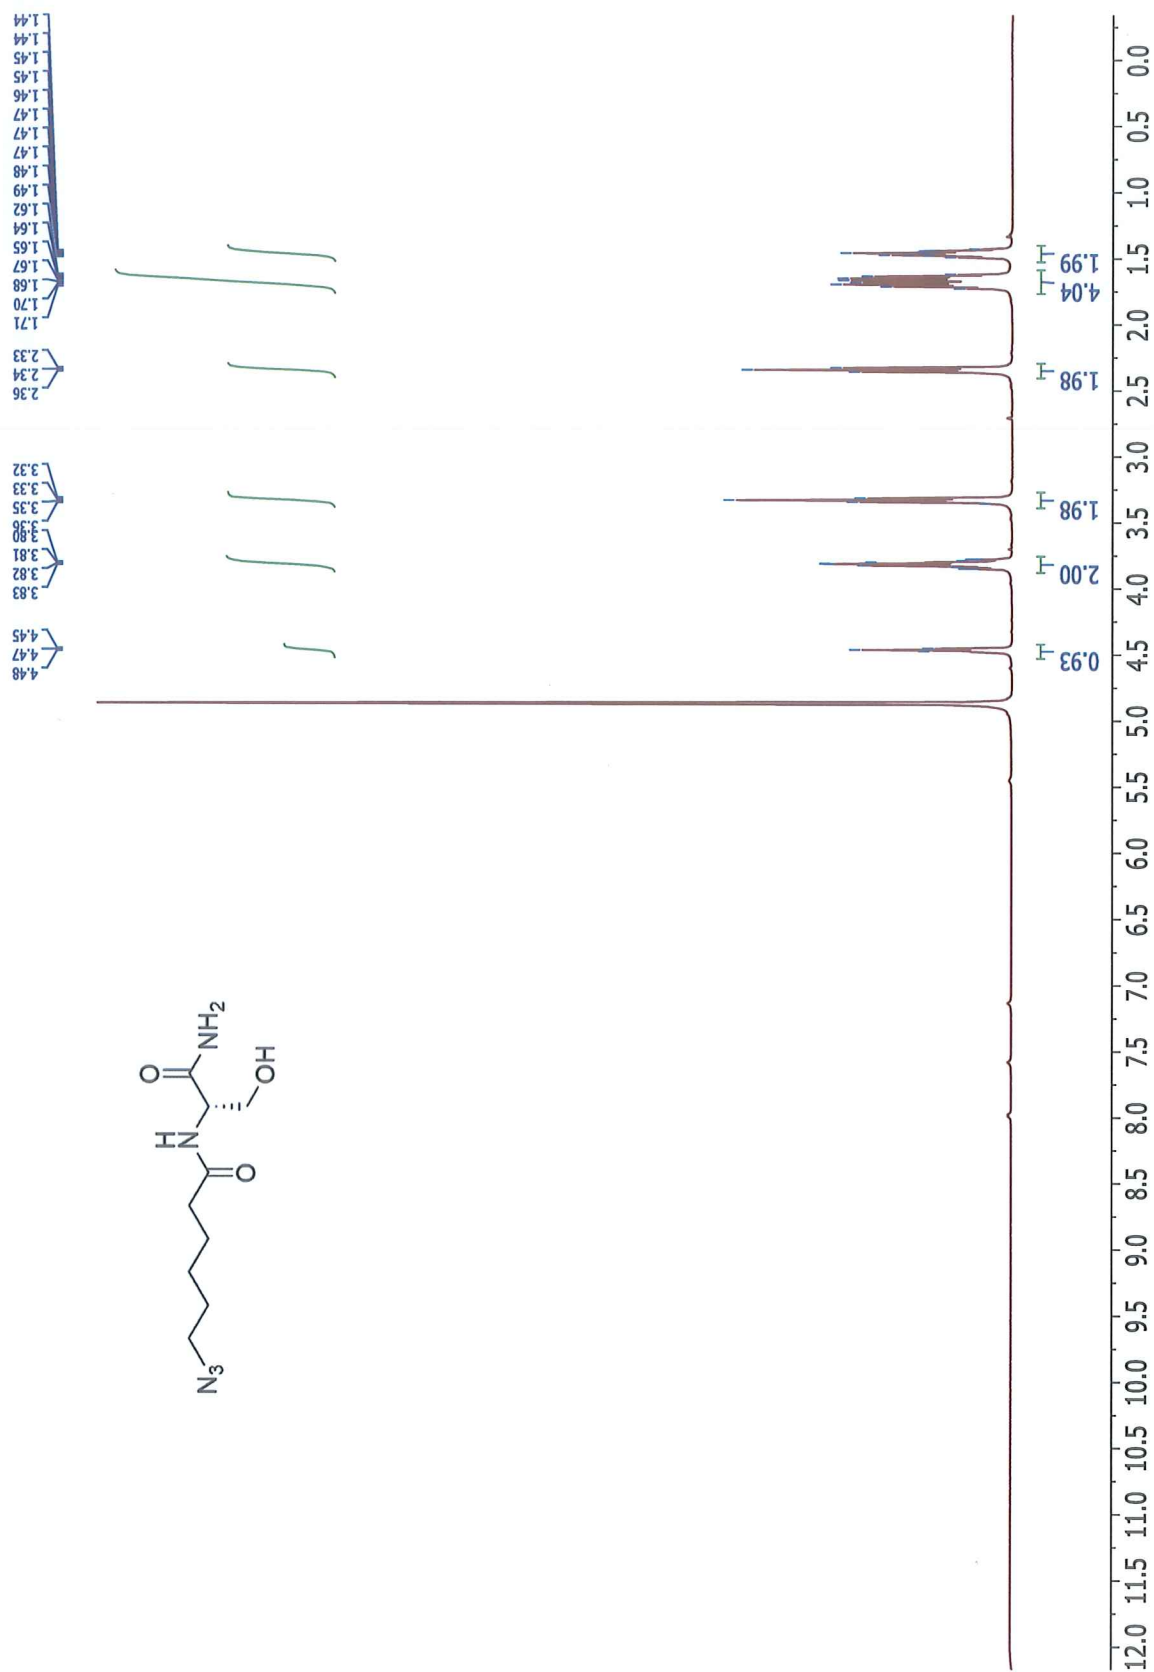

$^{13}\text{C}$ -NMR Spectrum of 11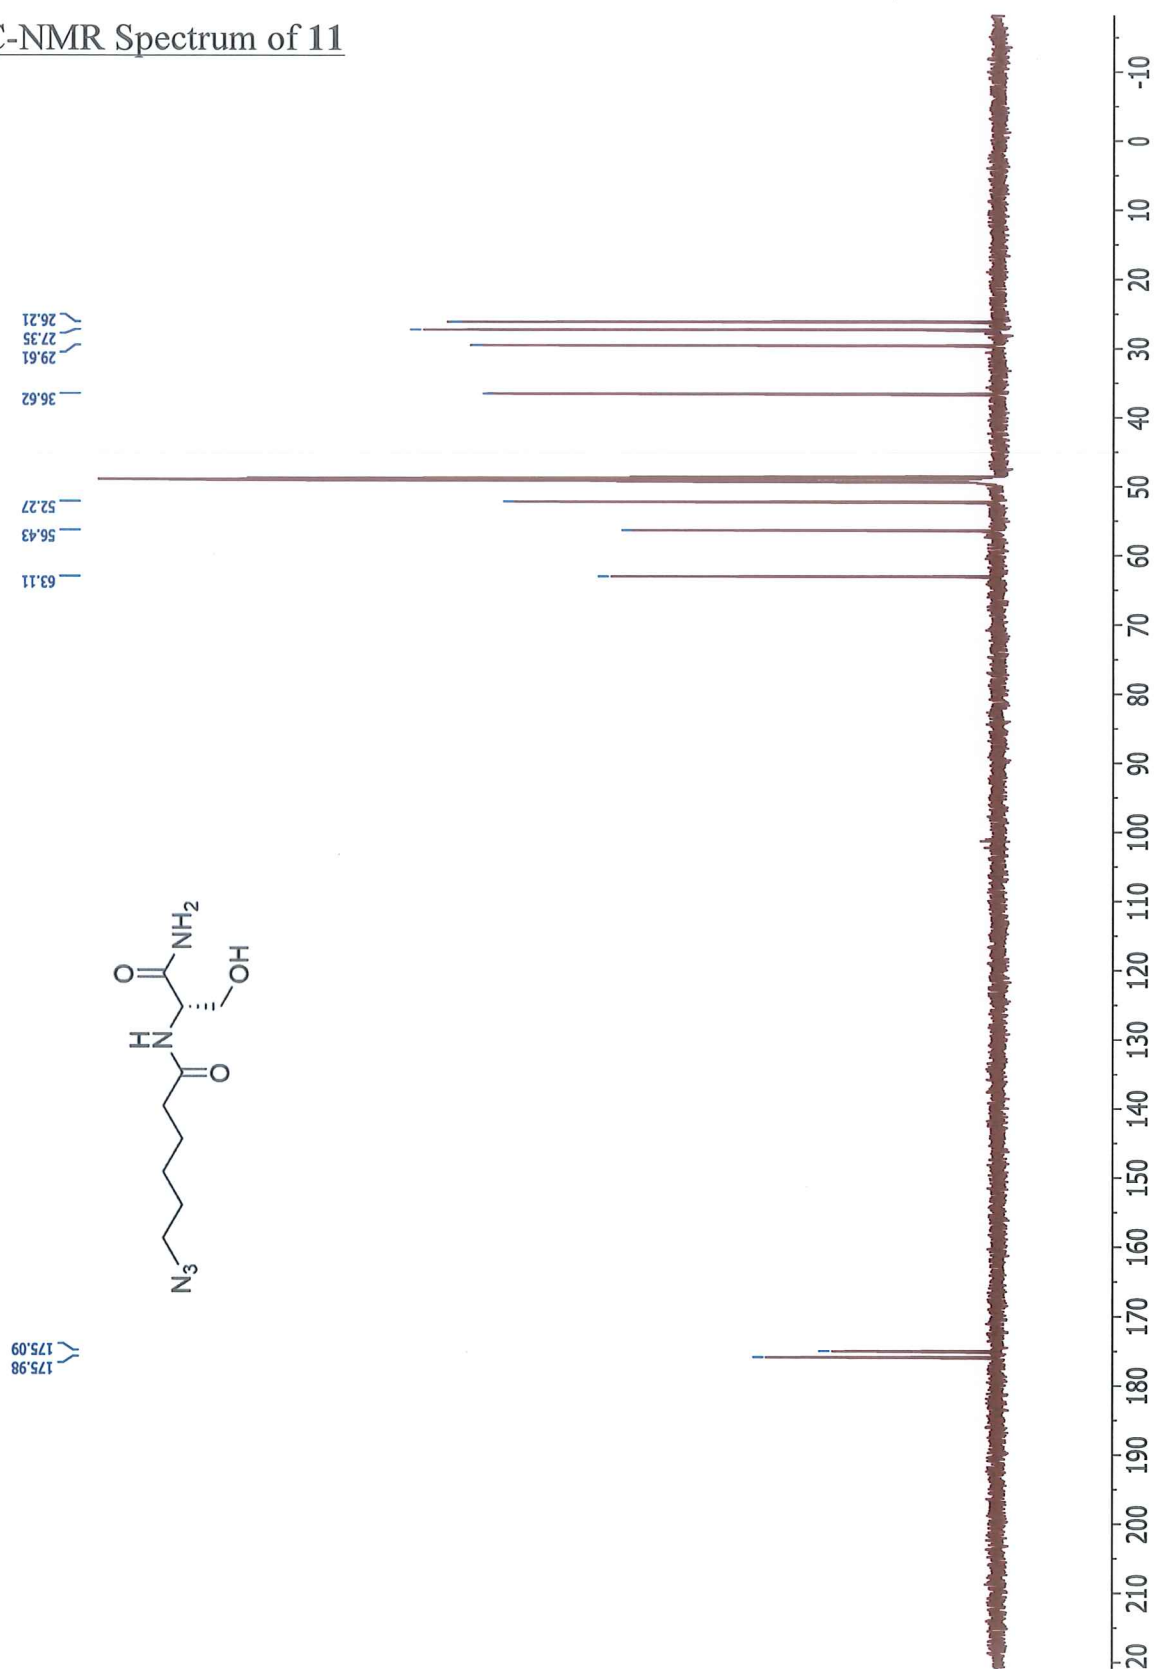

$^1\text{H}$ -NMR Spectrum of 12a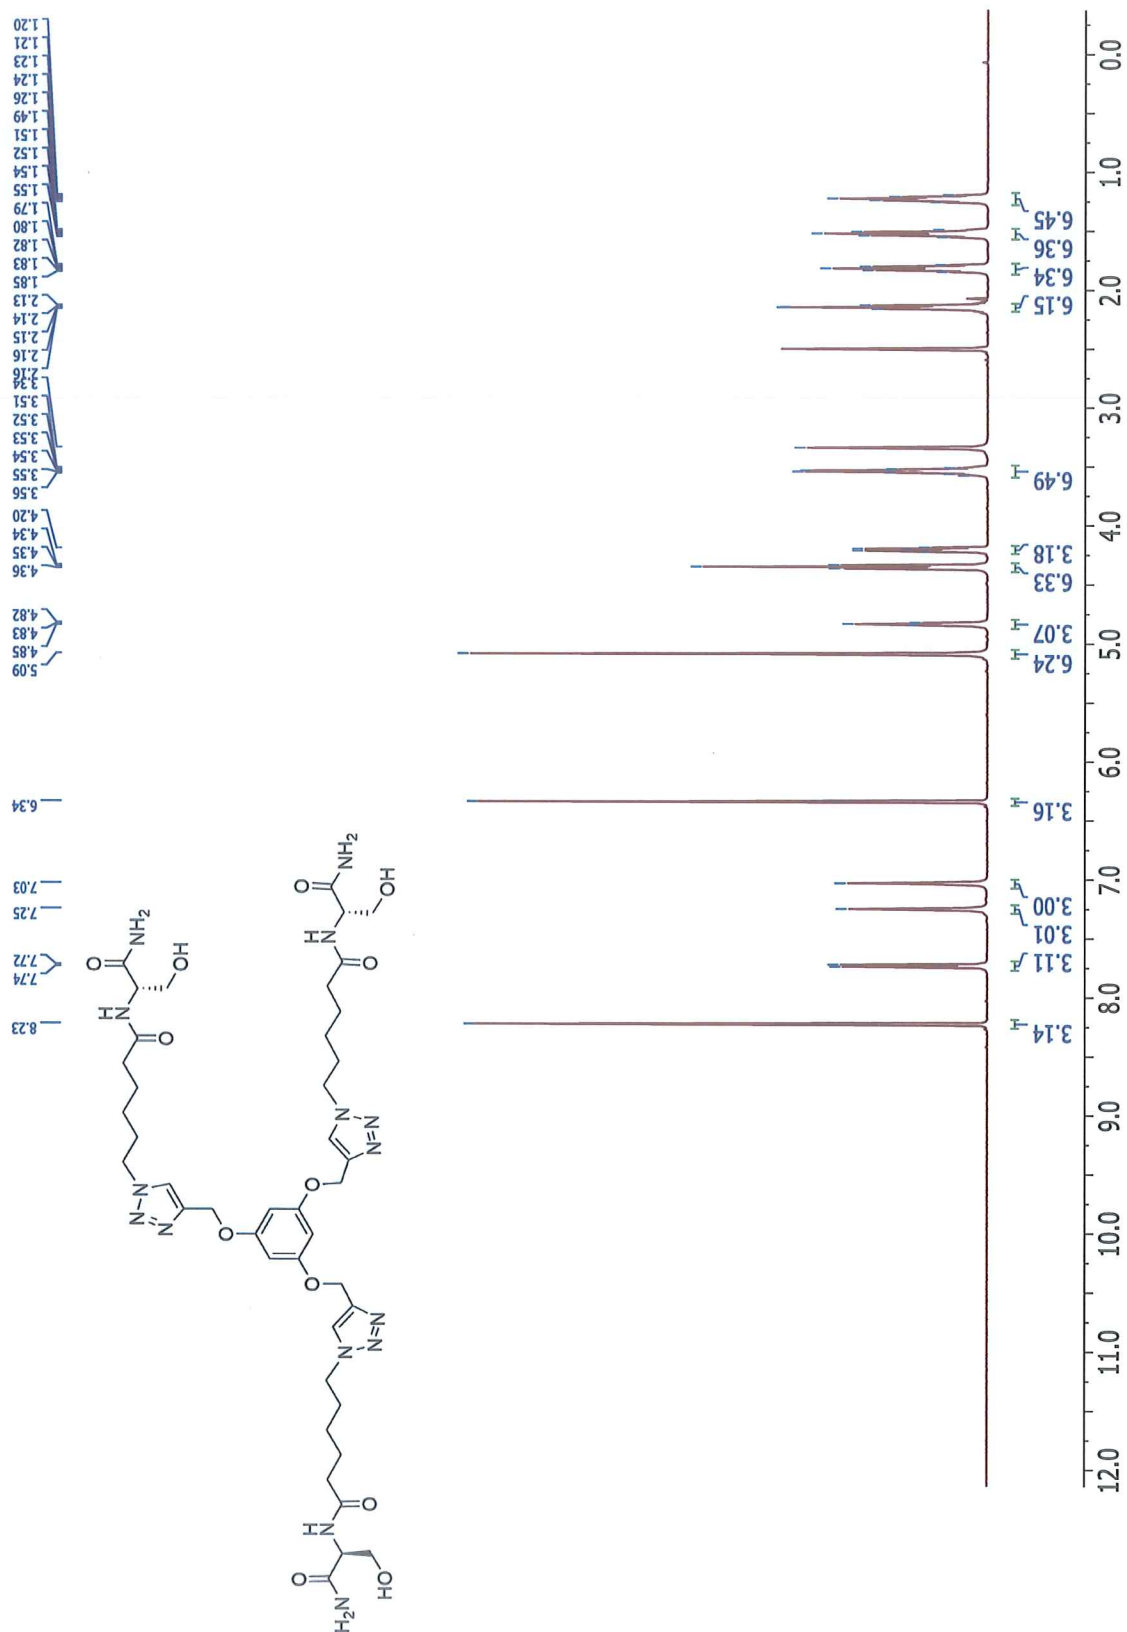

$^{13}\text{C}$ -NMR Spectrum of 12a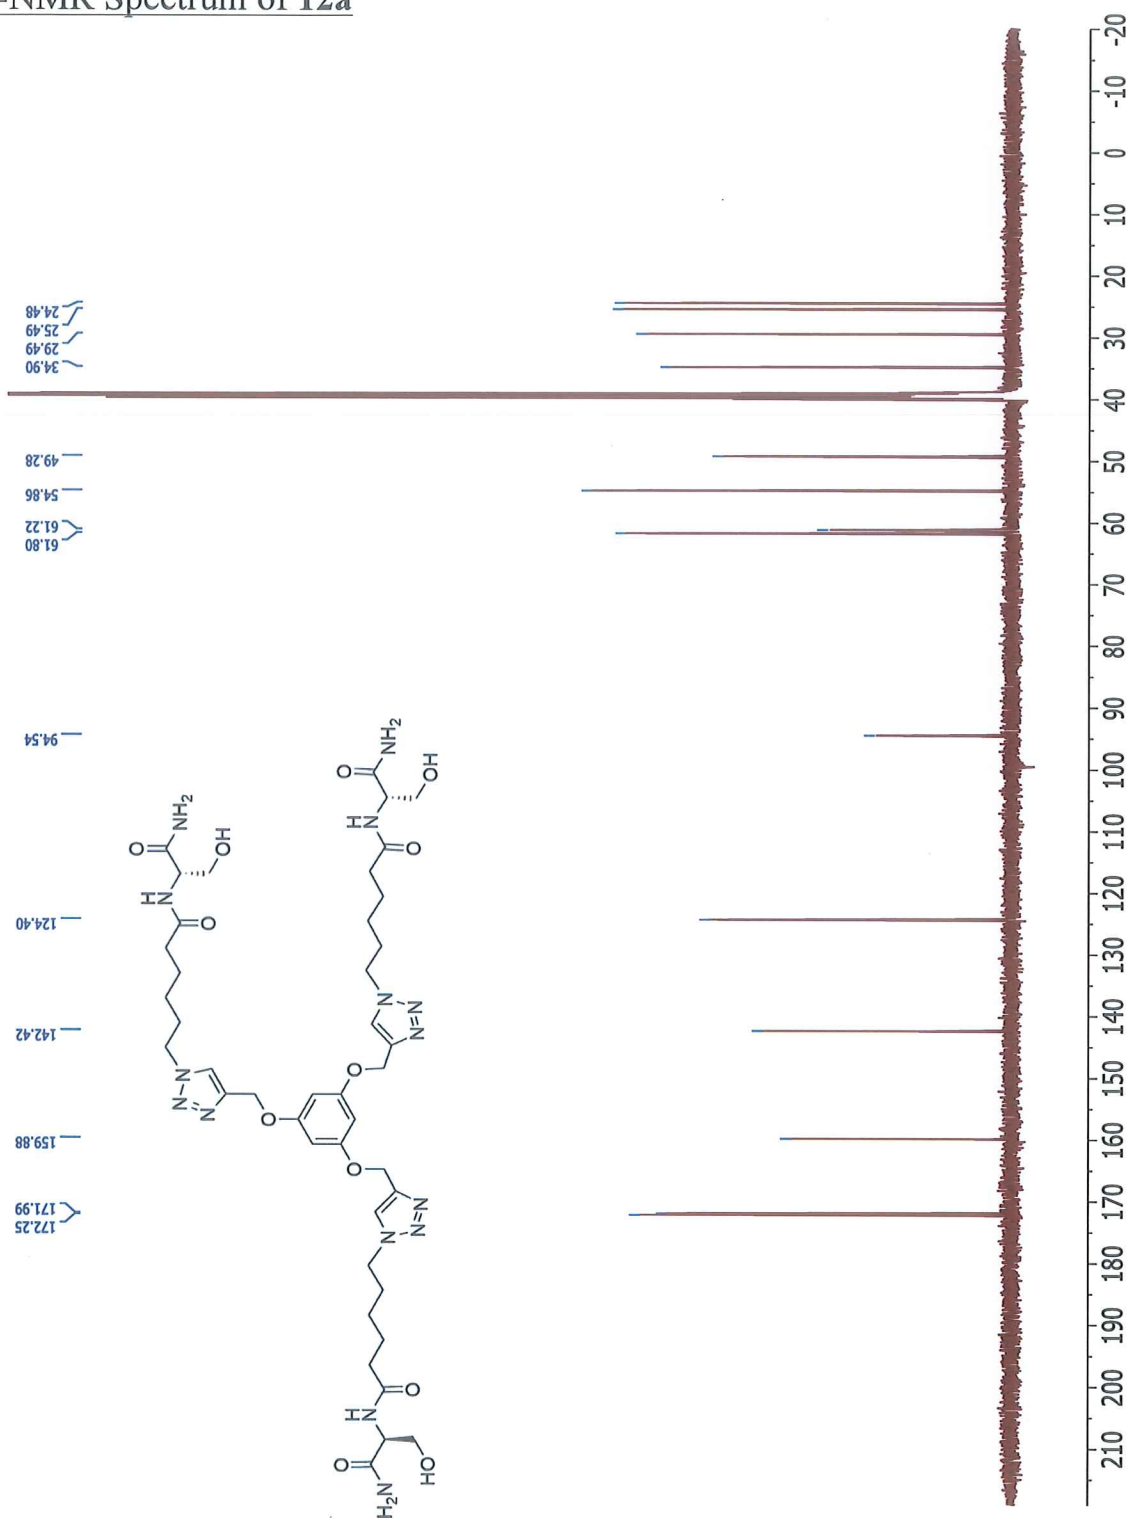

# <sup>1</sup>H-NMR Spectrum of 12b

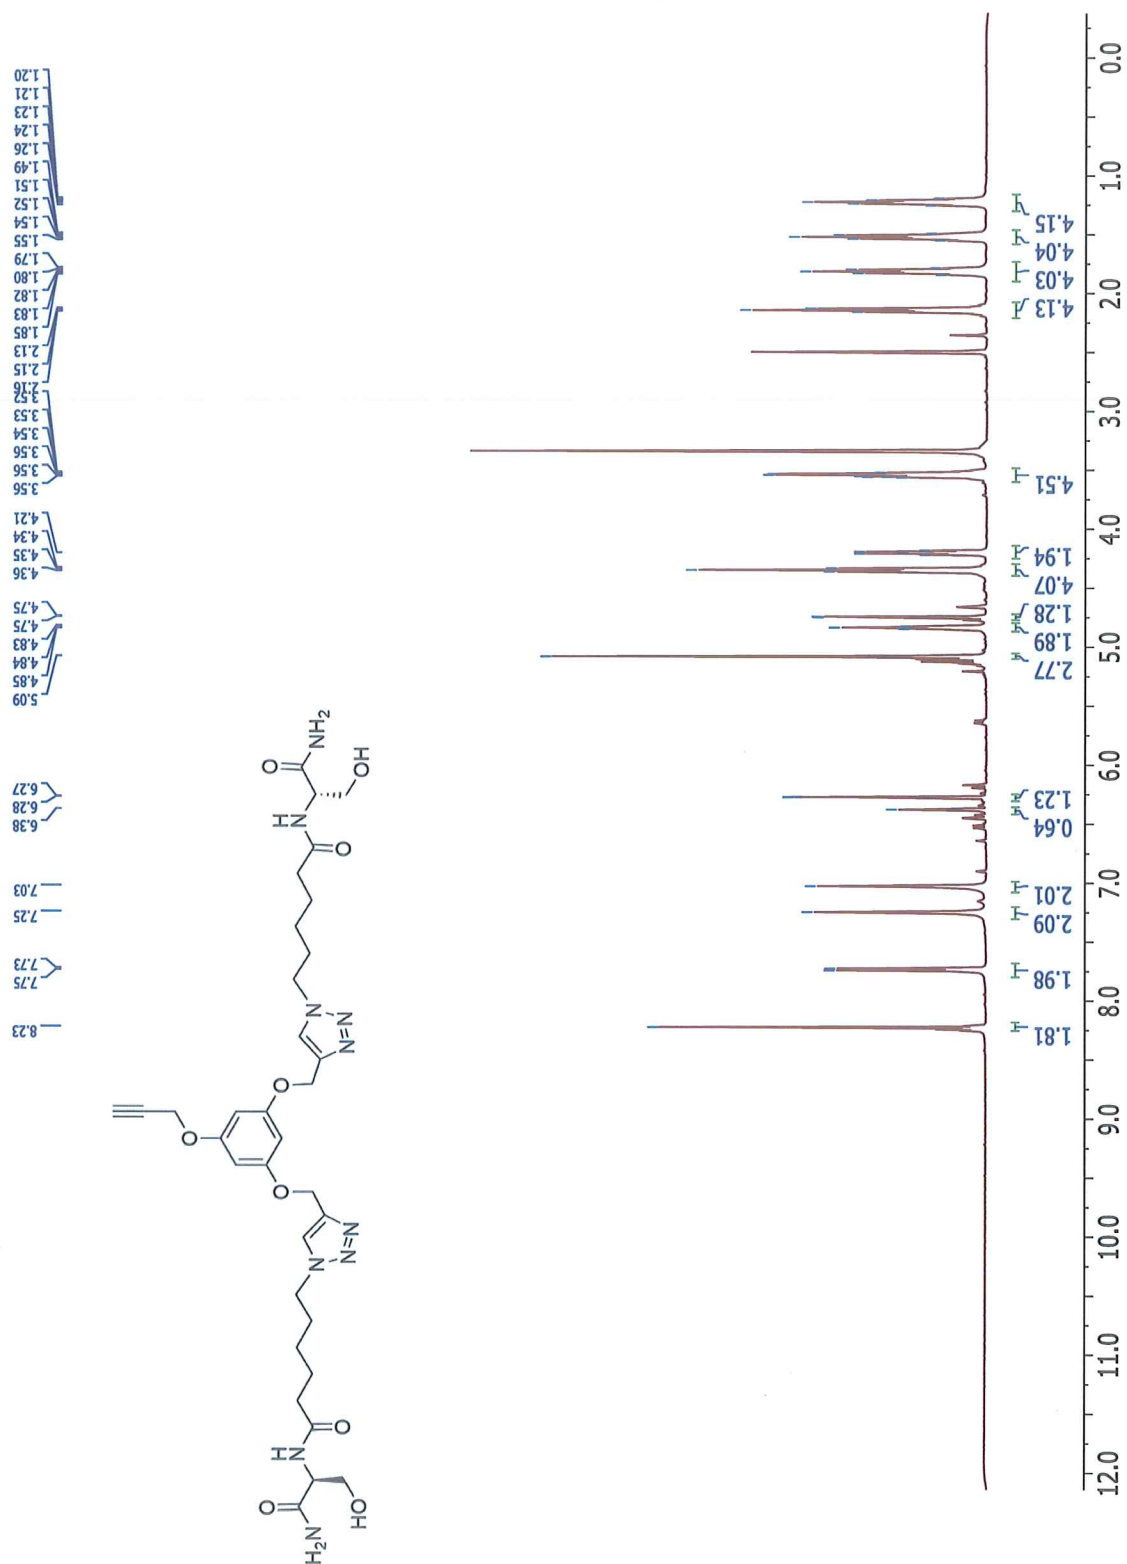



$^{13}\text{C}$ -NMR Spectrum of 12b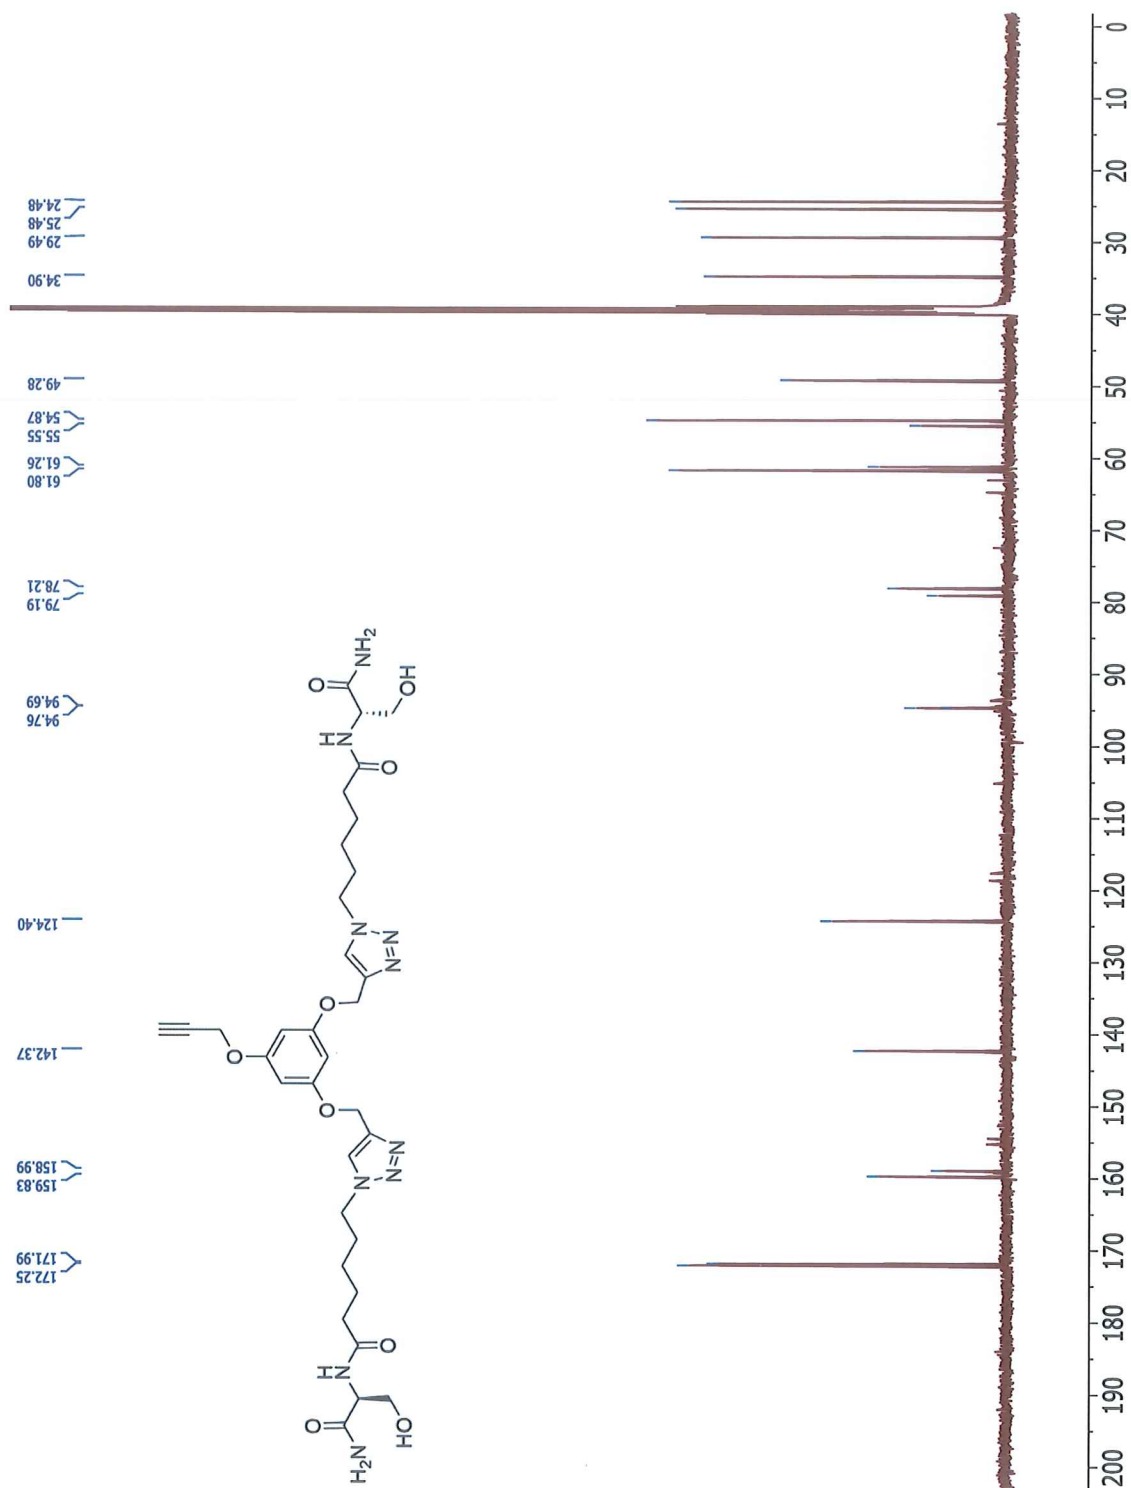

$^1\text{H}$ -NMR Spectrum of 12c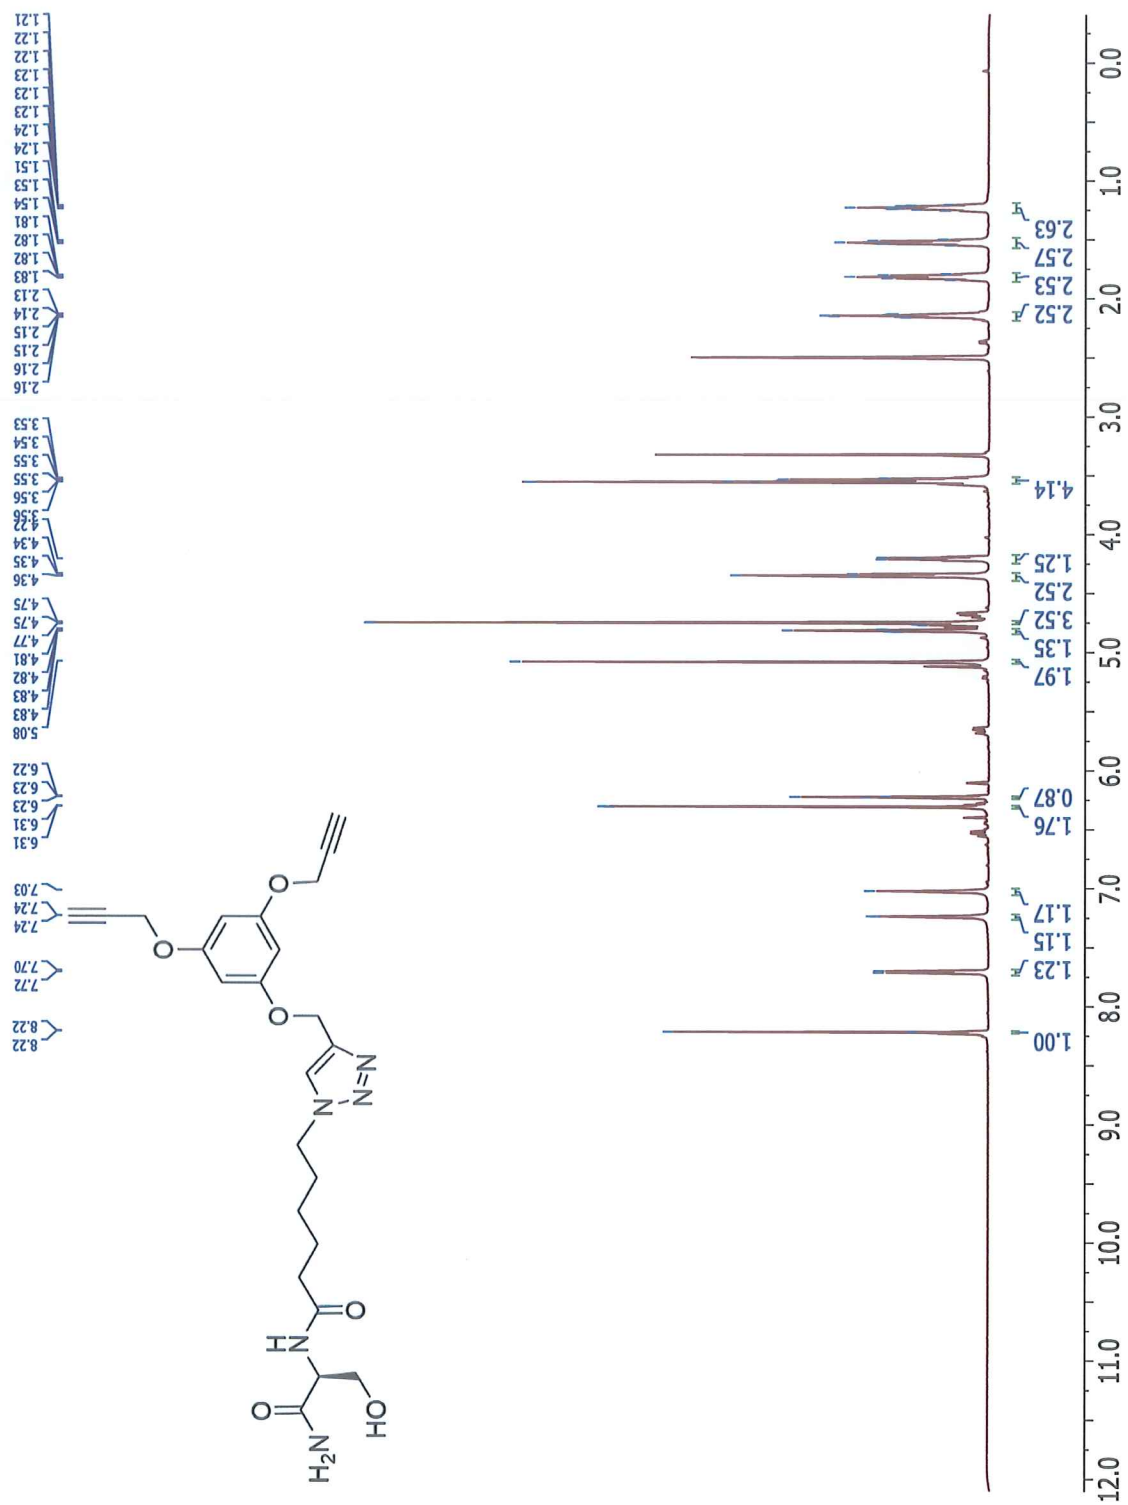

$^{13}\text{C}$ -NMR Spectrum of 12c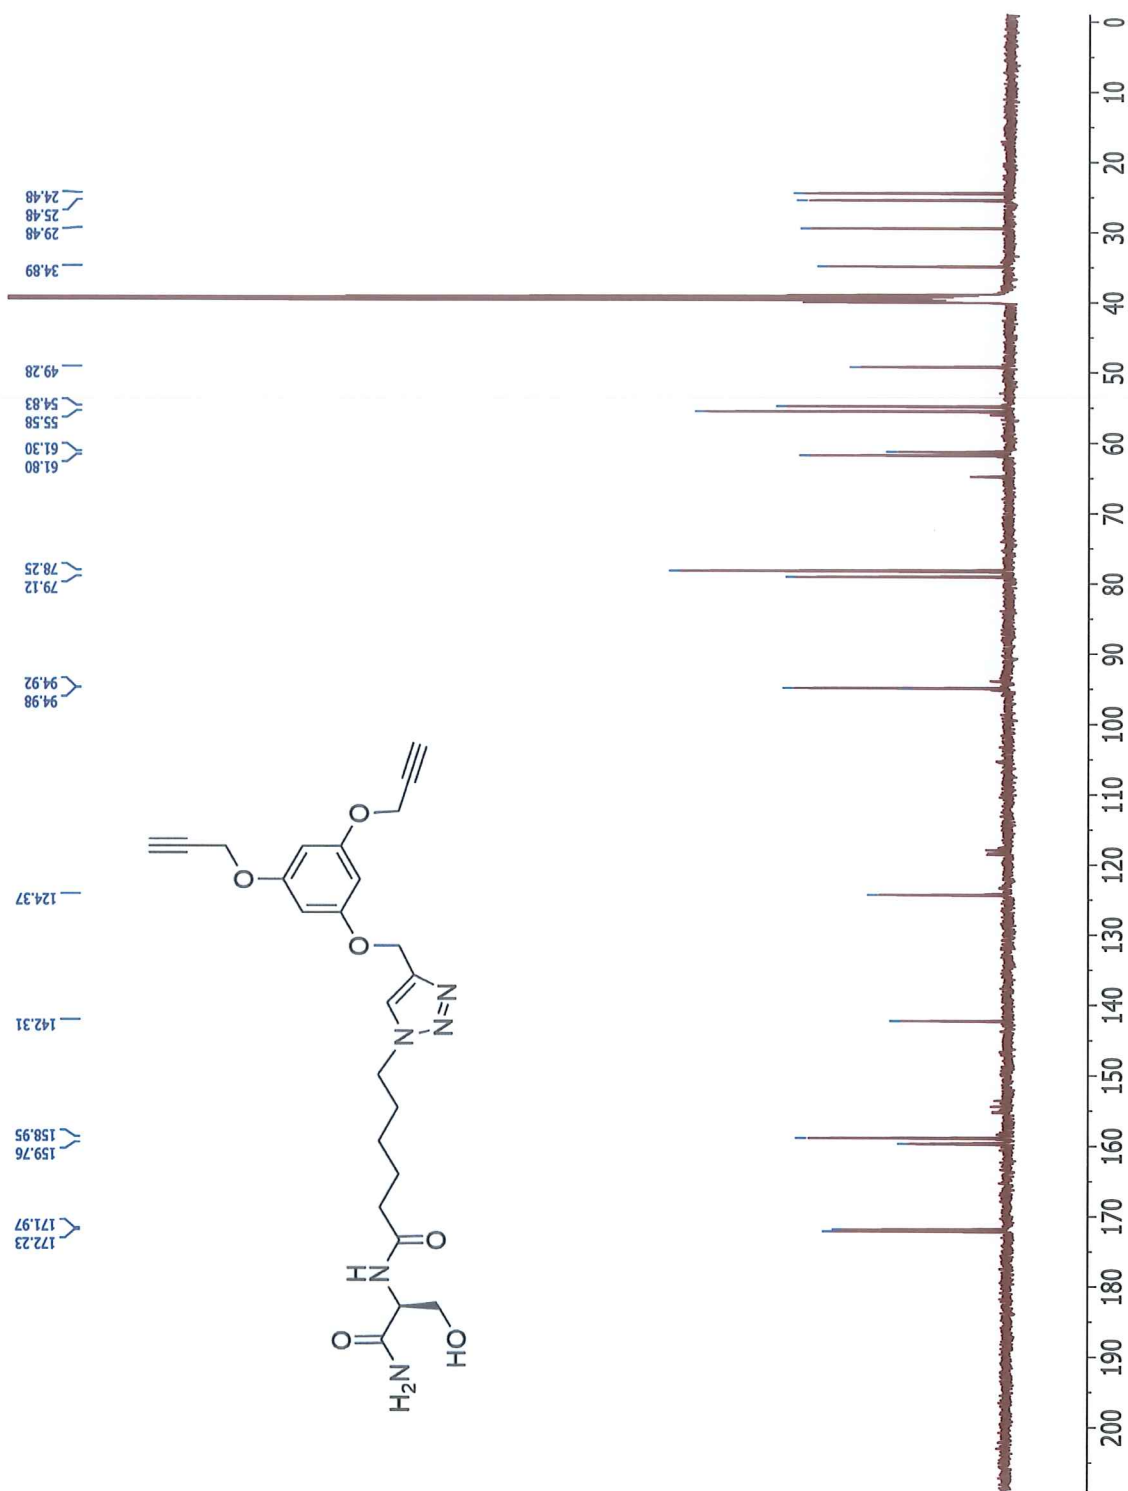

## HPLC Chromatogram of 14a

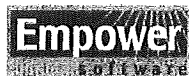

## Dual Channel Summary

Reported by User: System

Project Name: BIO5\_HPLC1

## SAMPLE INFORMATION

|                   |                    |                     |                              |
|-------------------|--------------------|---------------------|------------------------------|
| Sample Name:      | esh B2P148         | Acquired By:        | System                       |
| Sample Type:      | Unknown            | Date Acquired:      | 1/7/2014 10:36:53 PM MST     |
| Vial:             | 106                | Acq. Method Set:    | 10_90B_in                    |
| Injection #:      | 1                  | Date Processed:     | 1/8/2014 2:22:26 PM MST,     |
| Injection Volume: | 10.00 ul           | Processing Method   | Peptide_general              |
| Run Time:         | 45.0 Minutes       | Channel Name:       | 2487Channel 1, 2487Channel 2 |
| Sample Set Name   | Prime_Run_07_19_07 | Proc. Chnl. Descr.: | 220nm, 280nm                 |

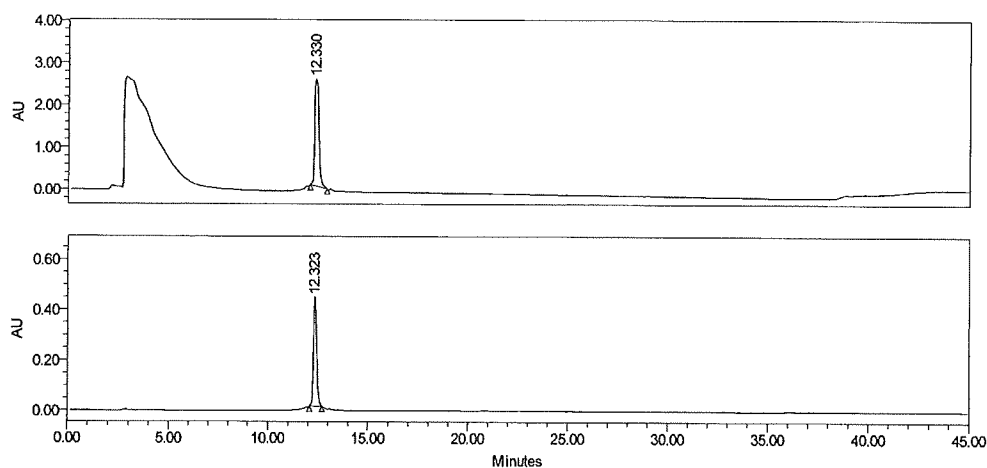

— Sample Name: esh B2P148; Proc. Chan. Descr. 220nm  
 — Sample Name: esh B2P148; Proc. Chan. Descr. 280nm

Channel 220 nm  
 Channel: 2487Channel 1

|   | RT     | Area<br>( $\mu\text{V}\cdot\text{sec}$ ) | % Area | Channel       |
|---|--------|------------------------------------------|--------|---------------|
| 1 | 12.330 | 3.79e+007                                | 100.00 | 2487Channel 1 |

Channel 280 nm  
 Channel: 2487Channel 2

|   | RT     | Area<br>( $\mu\text{V}\cdot\text{sec}$ ) | % Area | Channel       |
|---|--------|------------------------------------------|--------|---------------|
| 1 | 12.323 | 4.90e+006                                | 100.00 | 2487Channel 2 |

NOTES:

## HPLC Chromatogram of 14b

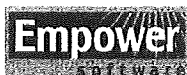

## Dual Channel Summary

Reported by User: System

Project Name: BIO5\_HPLC1

## SAMPLE INFORMATION

|                   |                    |                     |                              |
|-------------------|--------------------|---------------------|------------------------------|
| Sample Name:      | esh B2p146         | Acquired By:        | System                       |
| Sample Type:      | Unknown            | Date Acquired:      | 1/9/2014 7:15:16 PM MST      |
| Vial:             | 77                 | Acq. Method Set:    | 10_90B_in                    |
| Injection #:      | 1                  | Date Processed:     | 1/10/2014 1:35:09 PM MST,    |
| Injection Volume: | 10.00 ul           | Processing Method   | Peptide_general              |
| Run Time:         | 45.0 Minutes       | Channel Name:       | 2487Channel 1, 2487Channel 2 |
| Sample Set Name   | Prime_Run_07_19_07 | Proc. Chnl. Descr.: | 220nm, 280nm                 |

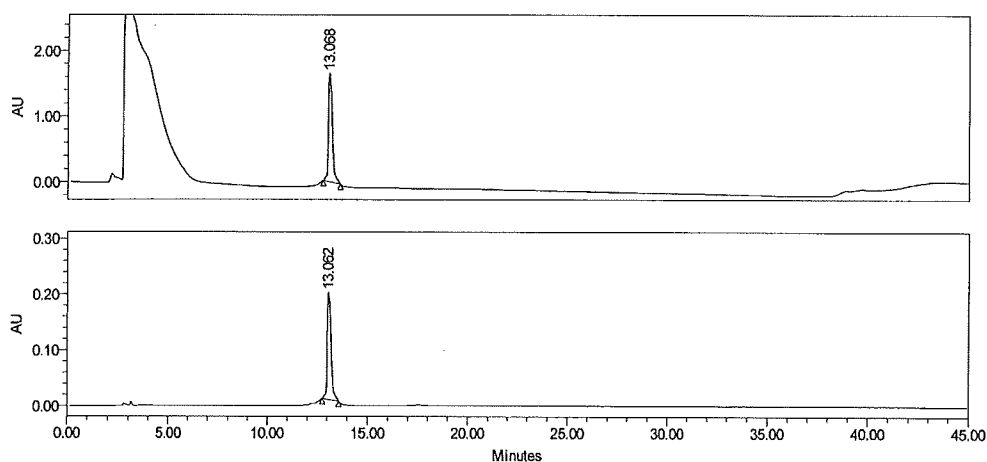

— Sample Name: esh B2p146; Proc. Chan. Descr. 220nm

— Sample Name: esh B2p146; Proc. Chan. Descr. 280nm

Channel 220 nm  
Channel: 2487Channel 1

|   | RT     | Area<br>( $\mu\text{V}\cdot\text{sec}$ ) | % Area | Channel       |
|---|--------|------------------------------------------|--------|---------------|
| 1 | 13.068 | 2.27e+007                                | 100.00 | 2487Channel 1 |

Channel 280 nm  
Channel: 2487Channel 2

|   | RT     | Area<br>( $\mu\text{V}\cdot\text{sec}$ ) | % Area | Channel       |
|---|--------|------------------------------------------|--------|---------------|
| 1 | 13.062 | 2.60e+006                                | 100.00 | 2487Channel 2 |

NOTES:

## HPLC Chromatogram of 14c

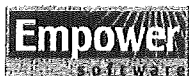

## Dual Channel Summary

Reported by User: System

Project Name: BIO5\_HPLC1

## SAMPLE INFORMATION

|                   |                    |                     |                              |
|-------------------|--------------------|---------------------|------------------------------|
| Sample Name:      | esh B2p82          | Acquired By:        | System                       |
| Sample Type:      | Unknown            | Date Acquired:      | 1/9/2014 6:29:07 PM MST      |
| Vial:             | 76                 | Acq. Method Set:    | 10_90B_in                    |
| Injection #:      | 1                  | Date Processed:     | 1/10/2014 1:34:17 PM MST,    |
| Injection Volume: | 10.00 ul           | Processing Method   | Peptide_general              |
| Run Time:         | 45.0 Minutes       | Channel Name:       | 2487Channel 1, 2487Channel 2 |
| Sample Set Name   | Prime_Run_07_19_07 | Proc. Chnl. Descr.: | 220nm, 280nm                 |

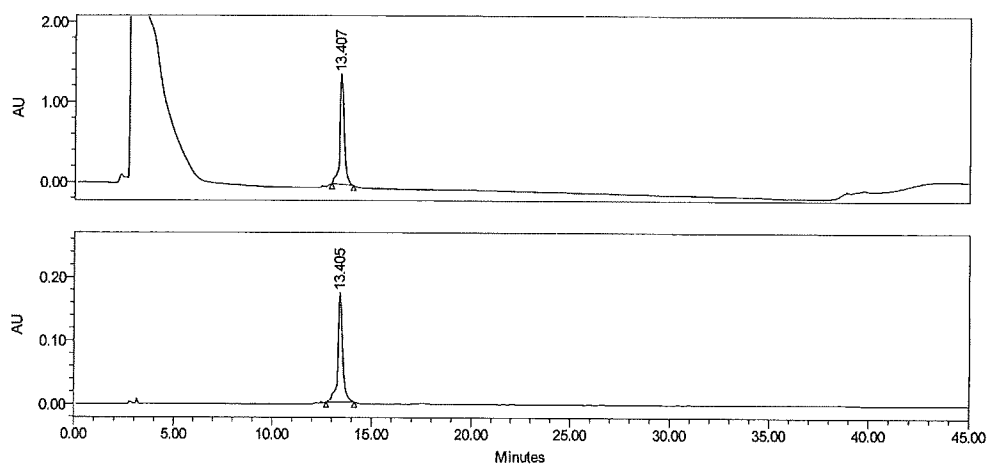

NOTES:

| Channel 220 nm         |                                          |        |               |
|------------------------|------------------------------------------|--------|---------------|
| Channel: 2487Channel 1 |                                          |        |               |
| RT                     | Area<br>( $\mu\text{V}\cdot\text{sec}$ ) | % Area | Channel       |
| 1 13.407               | 2.14e+007                                | 100.00 | 2487Channel 1 |

| Channel 280 nm         |                                          |        |               |
|------------------------|------------------------------------------|--------|---------------|
| Channel: 2487Channel 2 |                                          |        |               |
| RT                     | Area<br>( $\mu\text{V}\cdot\text{sec}$ ) | % Area | Channel       |
| 1 13.405               | 2.88e+006                                | 100.00 | 2487Channel 2 |

$^1\text{H}$ -NMR Spectrum of 15a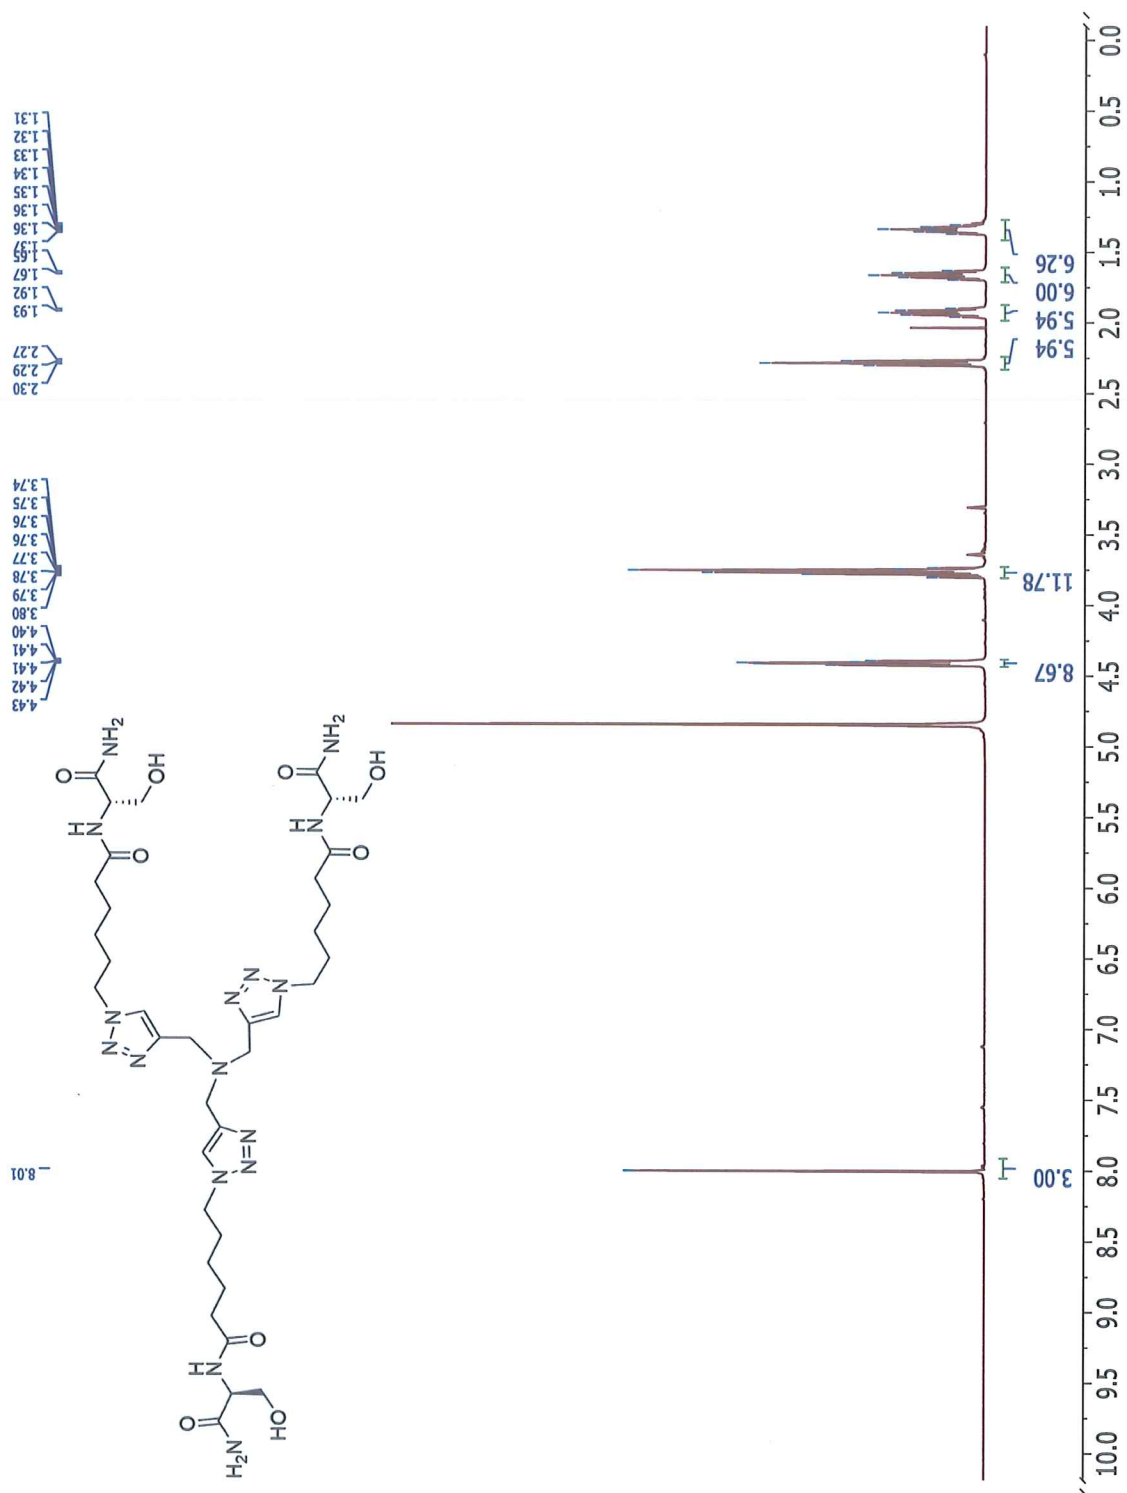

$^{13}\text{C}$ -NMR Spectrum of 15a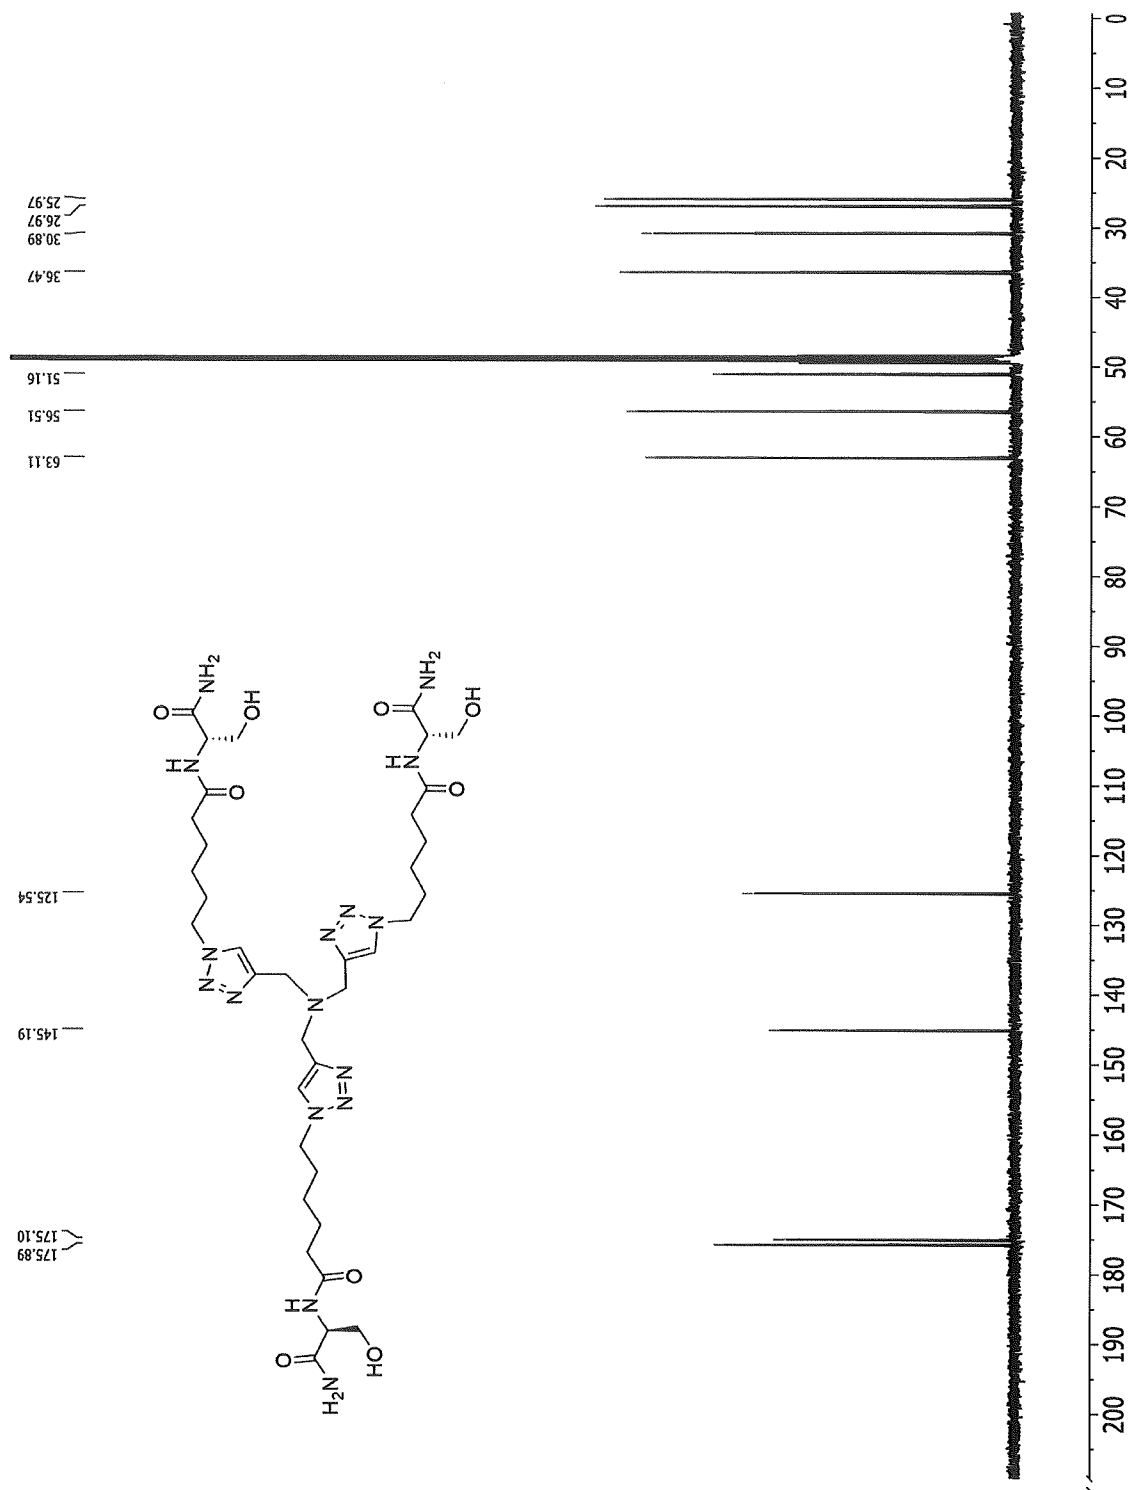



$^1\text{H}$ -NMR Spectrum of 15b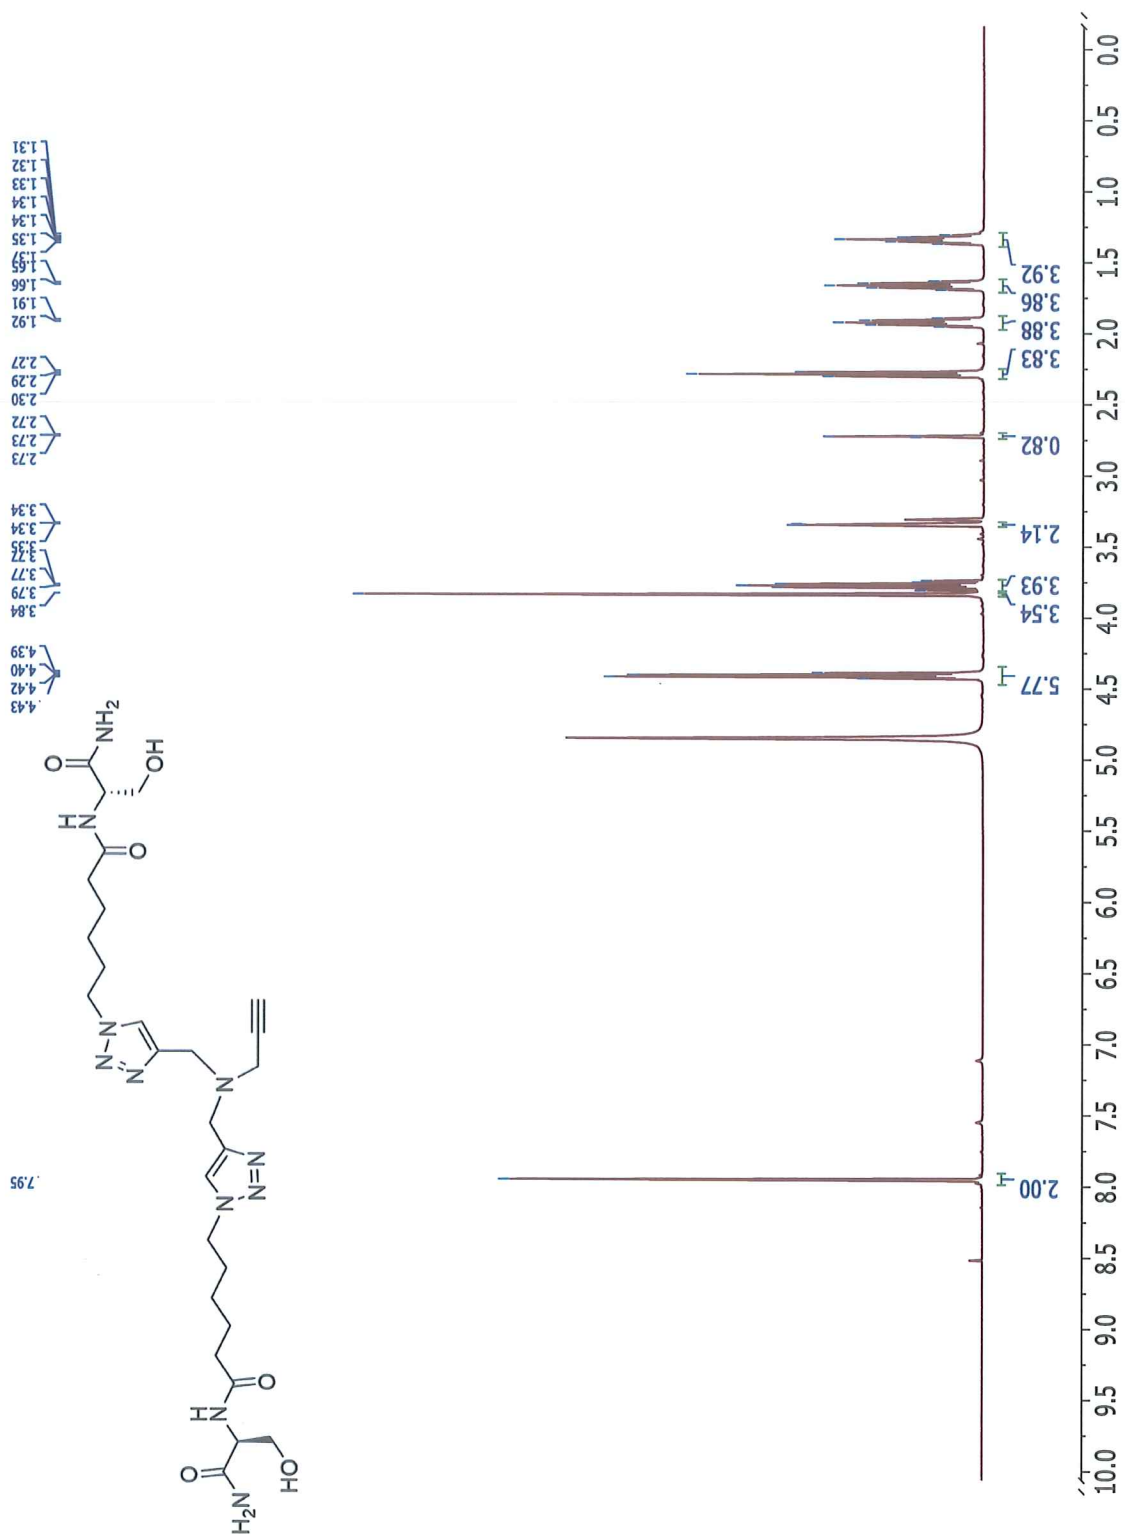

$^{13}\text{C}$ -NMR Spectrum of 15b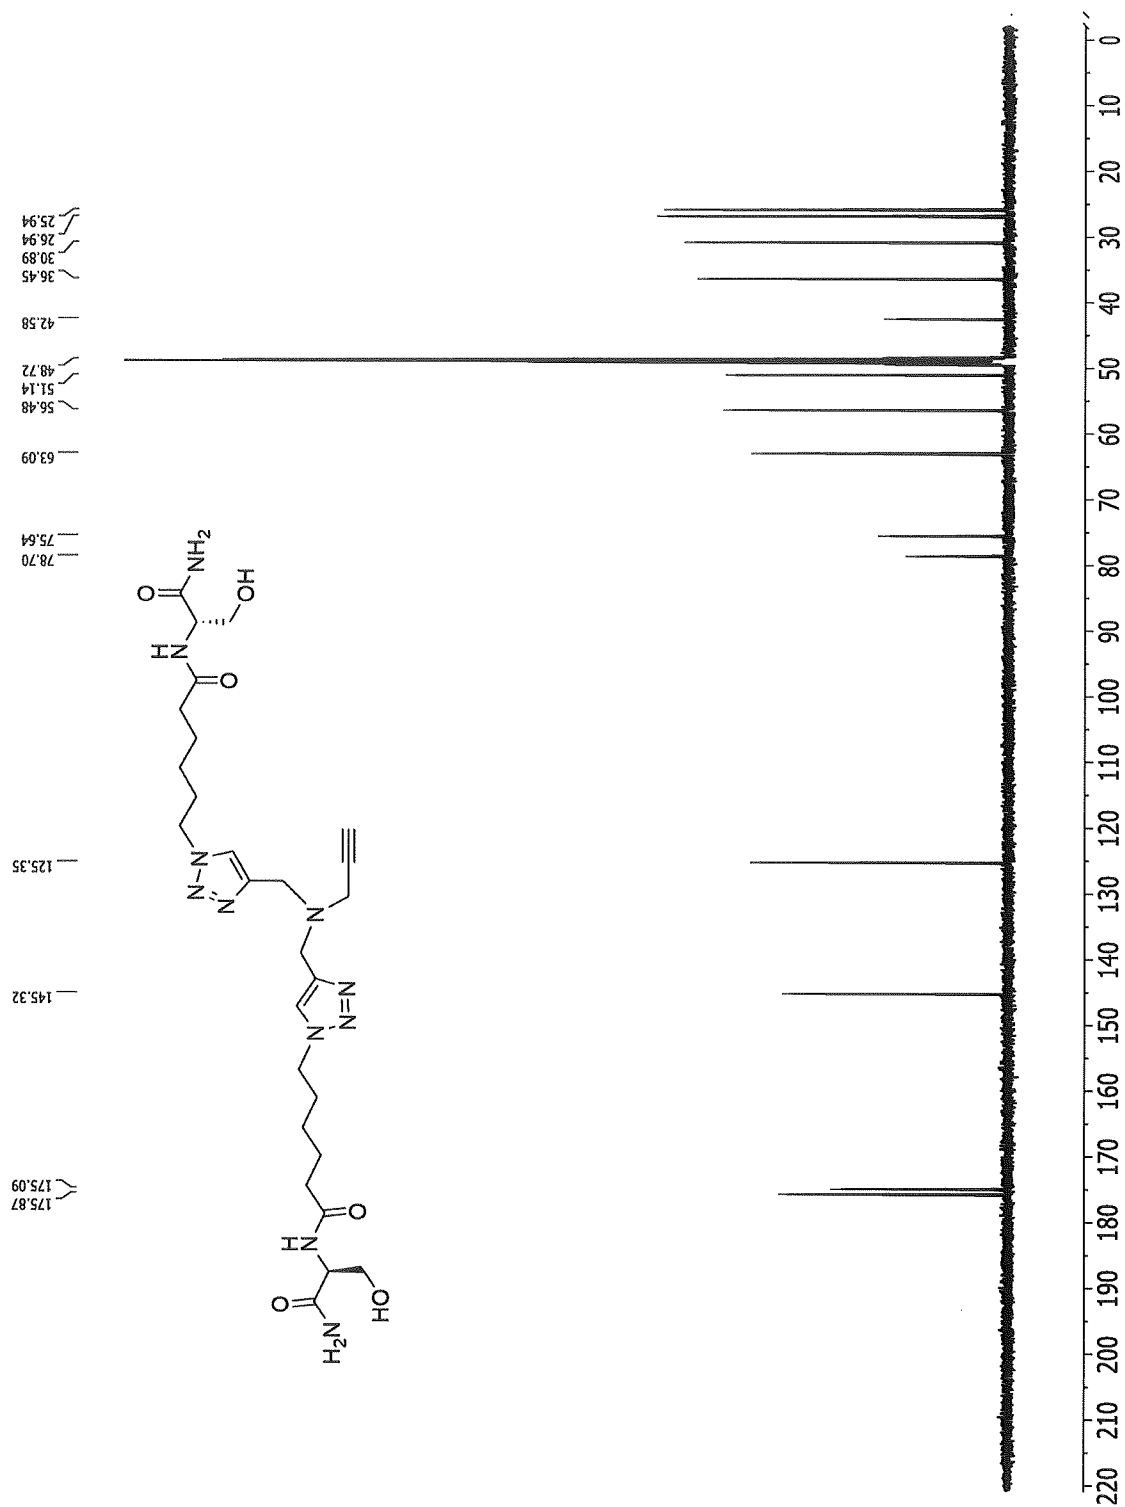

$^1\text{H}$ -NMR Spectrum of 15c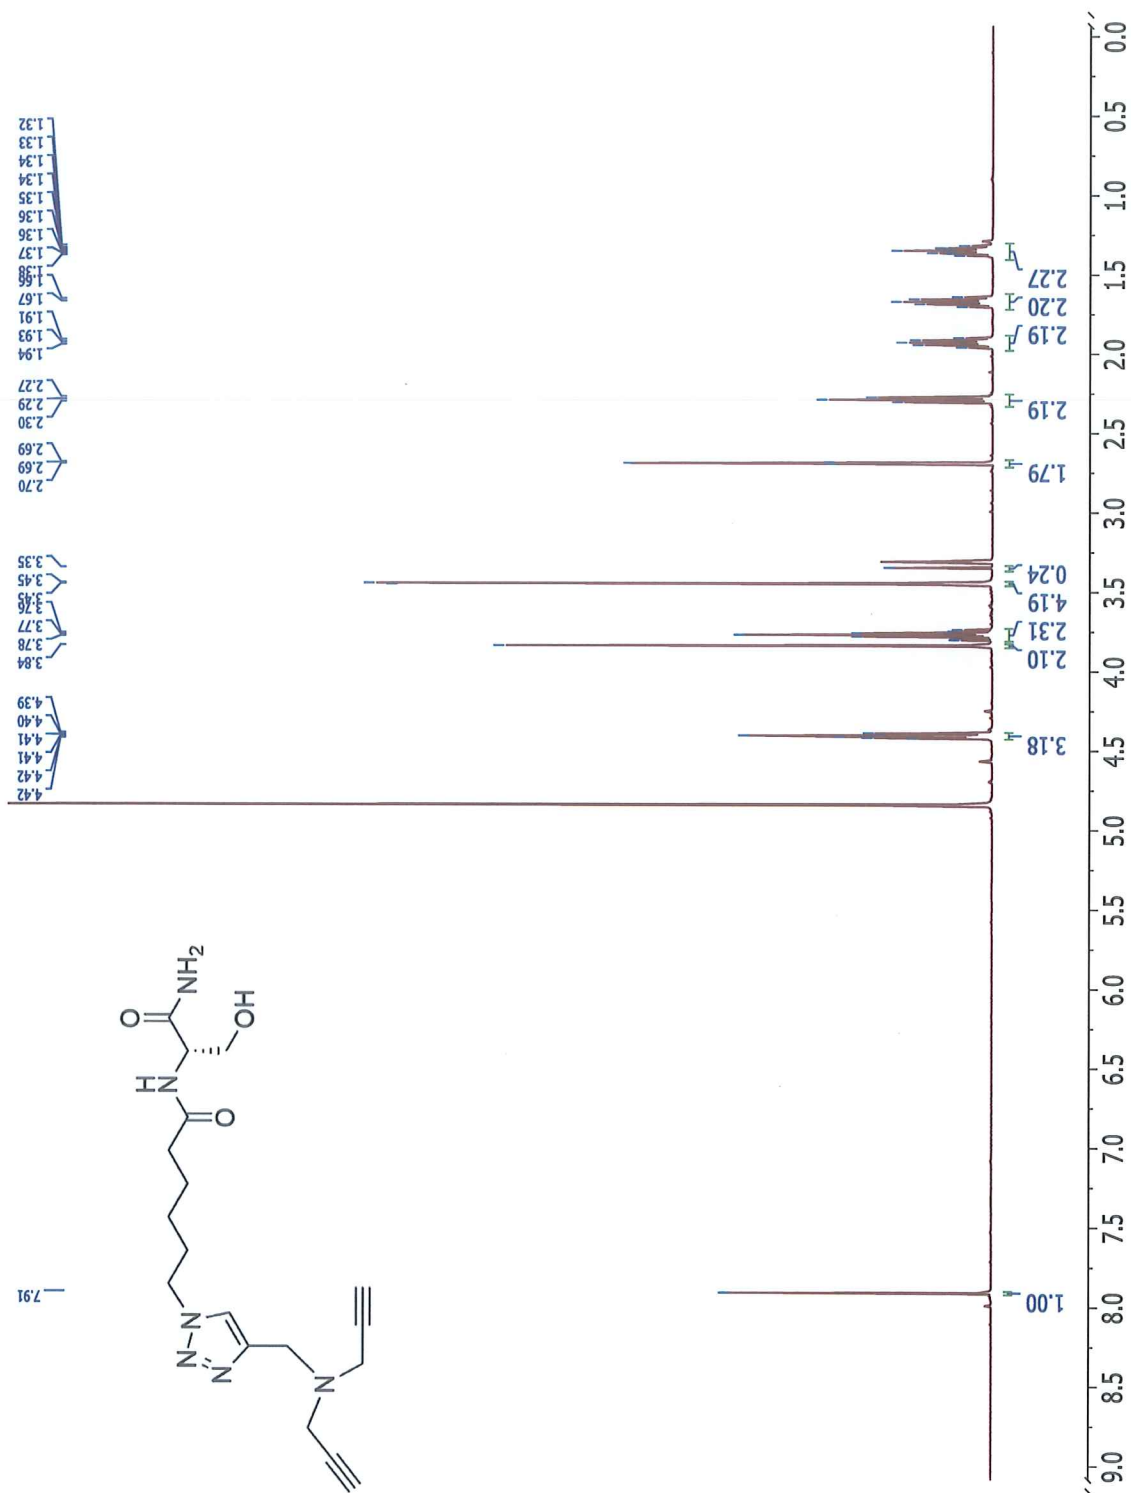

$^{13}\text{C}$ -NMR Spectrum of 15c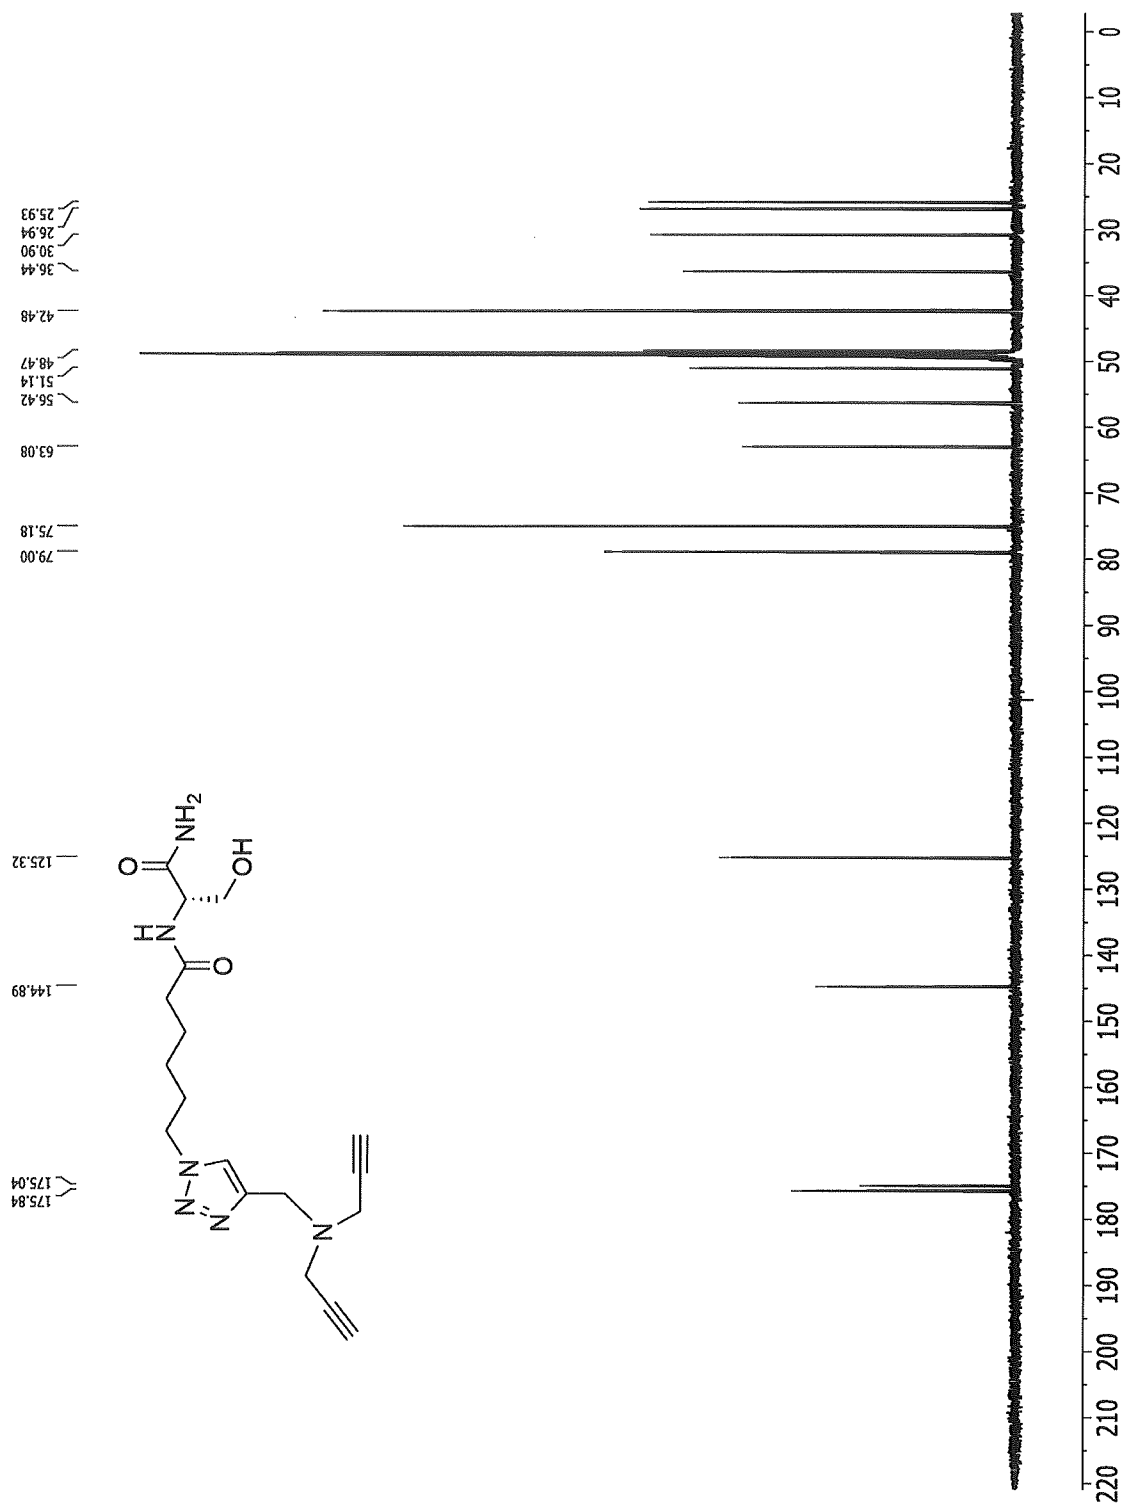

## HPLC Chromatogram of 16a

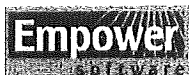

## Dual Channel Summary

Reported by User: System

Project Name: BIO5\_HPLC1

## SAMPLE INFORMATION

|                   |                    |                     |                              |
|-------------------|--------------------|---------------------|------------------------------|
| Sample Name:      | esh B2P212_2       | Acquired By:        | System                       |
| Sample Type:      | Unknown            | Date Acquired:      | 9/26/2013 5:02:59 PM MDT     |
| Vial:             | 87                 | Acq. Method Set:    | 10_90B_in                    |
| Injection #:      | 1                  | Date Processed:     | 9/27/2013 2:39:35 PM MDT,    |
| Injection Volume: | 20.00 ul           | Processing Method   | Peptide_general              |
| Run Time:         | 45.0 Minutes       | Channel Name:       | 2487Channel 1, 2487Channel 2 |
| Sample Set Name   | Prime_Run_07_19_07 | Proc. Chnl. Descr.: | 220nm, 280nm                 |

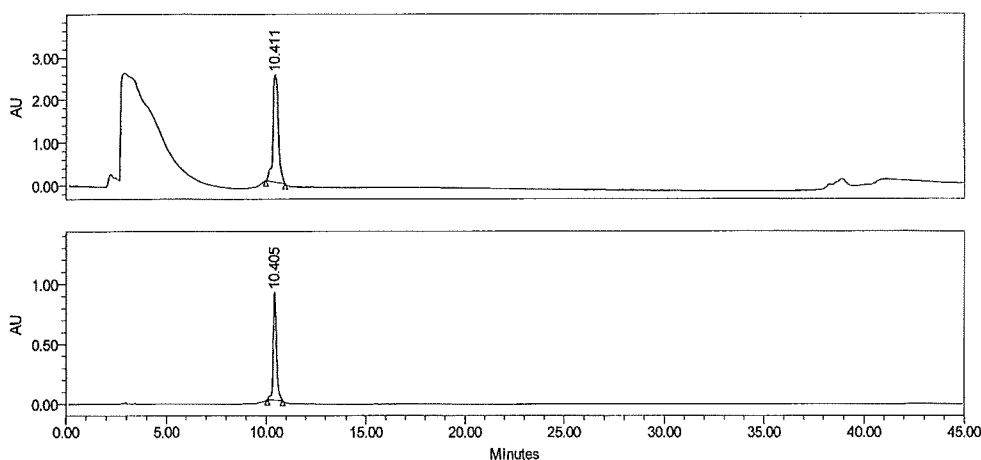

— Sample Name: esh B2P212\_2; Proc. Chan. Descr. 220nm  
 — Sample Name: esh B2P212\_2; Proc. Chan. Descr. 280nm

| Channel 220 nm         |                                          |        |               |
|------------------------|------------------------------------------|--------|---------------|
| Channel: 2487Channel 1 |                                          |        |               |
| RT                     | Area<br>( $\mu\text{V}\cdot\text{sec}$ ) | % Area | Channel       |
| 1 10.411               | 4.82e+007                                | 100.00 | 2487Channel 1 |

| Channel 280 nm         |                                          |        |               |
|------------------------|------------------------------------------|--------|---------------|
| Channel: 2487Channel 2 |                                          |        |               |
| RT                     | Area<br>( $\mu\text{V}\cdot\text{sec}$ ) | % Area | Channel       |
| 1 10.405               | 1.06e+007                                | 100.00 | 2487Channel 2 |

NOTES:

## HPLC Chromatogram of 16b

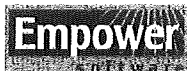

## Dual Channel Summary

Reported by User: System

Project Name: BIO5\_HPLC1

## SAMPLE INFORMATION

|                   |                    |                     |                              |
|-------------------|--------------------|---------------------|------------------------------|
| Sample Name:      | esh B2P216         | Acquired By:        | System                       |
| Sample Type:      | Unknown            | Date Acquired:      | 1/7/2014 4:27:57 PM MST      |
| Vial:             | 98                 | Acq. Method Set:    | 10_90B_in                    |
| Injection #:      | 1                  | Date Processed:     | 1/8/2014 2:11:48 PM MST,     |
| Injection Volume: | 10.00 uL           | Processing Method   | Peptide_general              |
| Run Time:         | 45.0 Minutes       | Channel Name:       | 2487Channel 1, 2487Channel 2 |
| Sample Set Name   | Prime_Run_07_19_07 | Proc. Chnl. Descr.: | 220nm, 280nm                 |

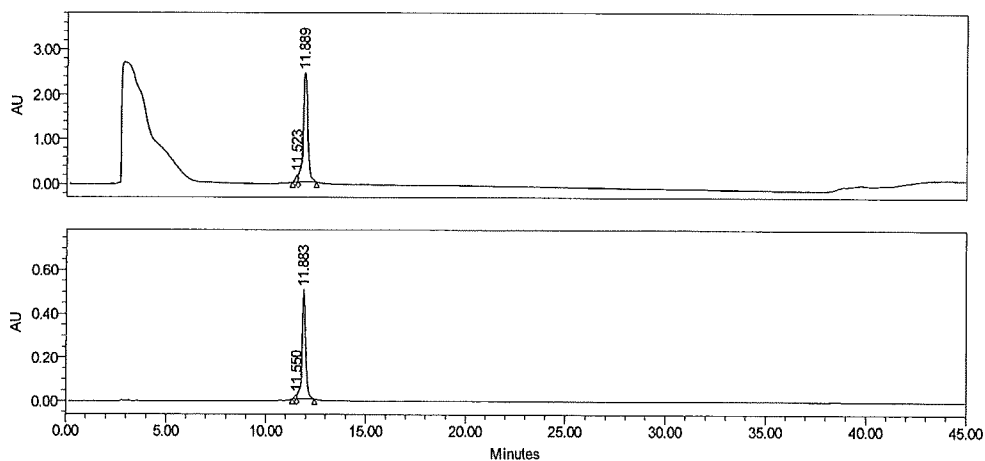

Channel 220 nm  
Channel: 2487Channel 1

| RT       | Area<br>( $\mu\text{V}\cdot\text{sec}$ ) | % Area | Channel       |
|----------|------------------------------------------|--------|---------------|
| 1 11.889 | 3.94e+007                                | 96.71  | 2487Channel 1 |

Channel 280 nm  
Channel: 2487Channel 2

| RT       | Area<br>( $\mu\text{V}\cdot\text{sec}$ ) | % Area | Channel       |
|----------|------------------------------------------|--------|---------------|
| 1 11.883 | 6.42e+006                                | 98.04  | 2487Channel 2 |

NOTES:

## HPLC Chromatogram of 16c

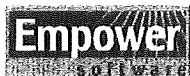

## Dual Channel Summary

Reported by User: System

Project Name: BIO5\_HPLC1

## SAMPLE INFORMATION

|                   |                    |                     |                              |
|-------------------|--------------------|---------------------|------------------------------|
| Sample Name:      | esh B2P208         | Acquired By:        | System                       |
| Sample Type:      | Unknown            | Date Acquired:      | 1/9/2014 4:10:54 PM MST      |
| Vial:             | 73                 | Acq. Method Set:    | 10_90B_in                    |
| Injection #:      | 1                  | Date Processed:     | 1/10/2014 1:31:17 PM MST,    |
| Injection Volume: | 10.00 $\mu$ l      | Processing Method   | Peptide_general              |
| Run Time:         | 45.0 Minutes       | Channel Name:       | 2487Channel 1, 2487Channel 2 |
| Sample Set Name   | Prime_Run_07_19_07 | Proc. Chnl. Descr.: | 220nm, 280nm                 |

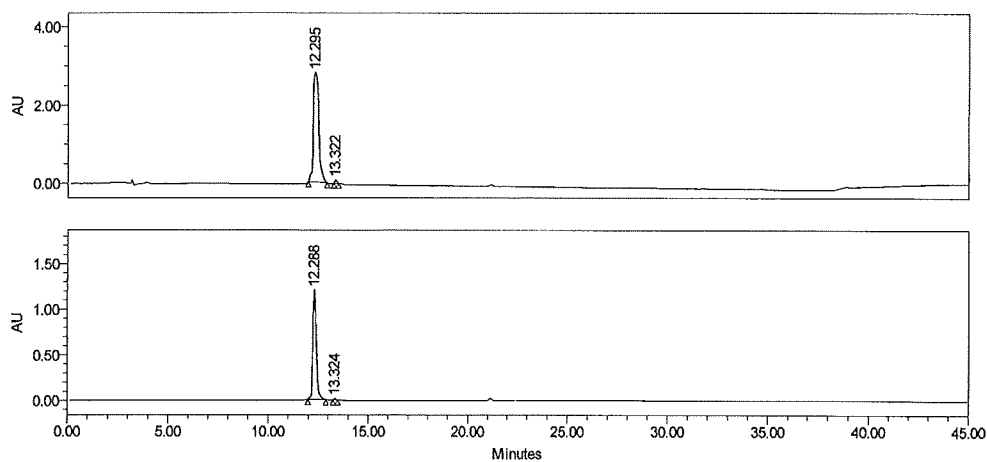

— Sample Name: esh B2P208; Proc. Chan. Descr. 220nm  
 — Sample Name: esh B2P208; Proc. Chan. Descr. 280nm

Channel 220 nm  
 Channel: 2487Channel 1

|   | RT     | Area<br>( $\mu$ V*sec) | % Area | Channel       |
|---|--------|------------------------|--------|---------------|
| 1 | 12.295 | 5.27e+007              | 98.95  | 2487Channel 1 |

Channel 280 nm  
 Channel: 2487Channel 2

|   | RT     | Area<br>( $\mu$ V*sec) | % Area | Channel       |
|---|--------|------------------------|--------|---------------|
| 1 | 12.288 | 1.45e+007              | 89.34  | 2487Channel 2 |

NOTES:

$^1\text{H}$ -NMR Spectrum of 17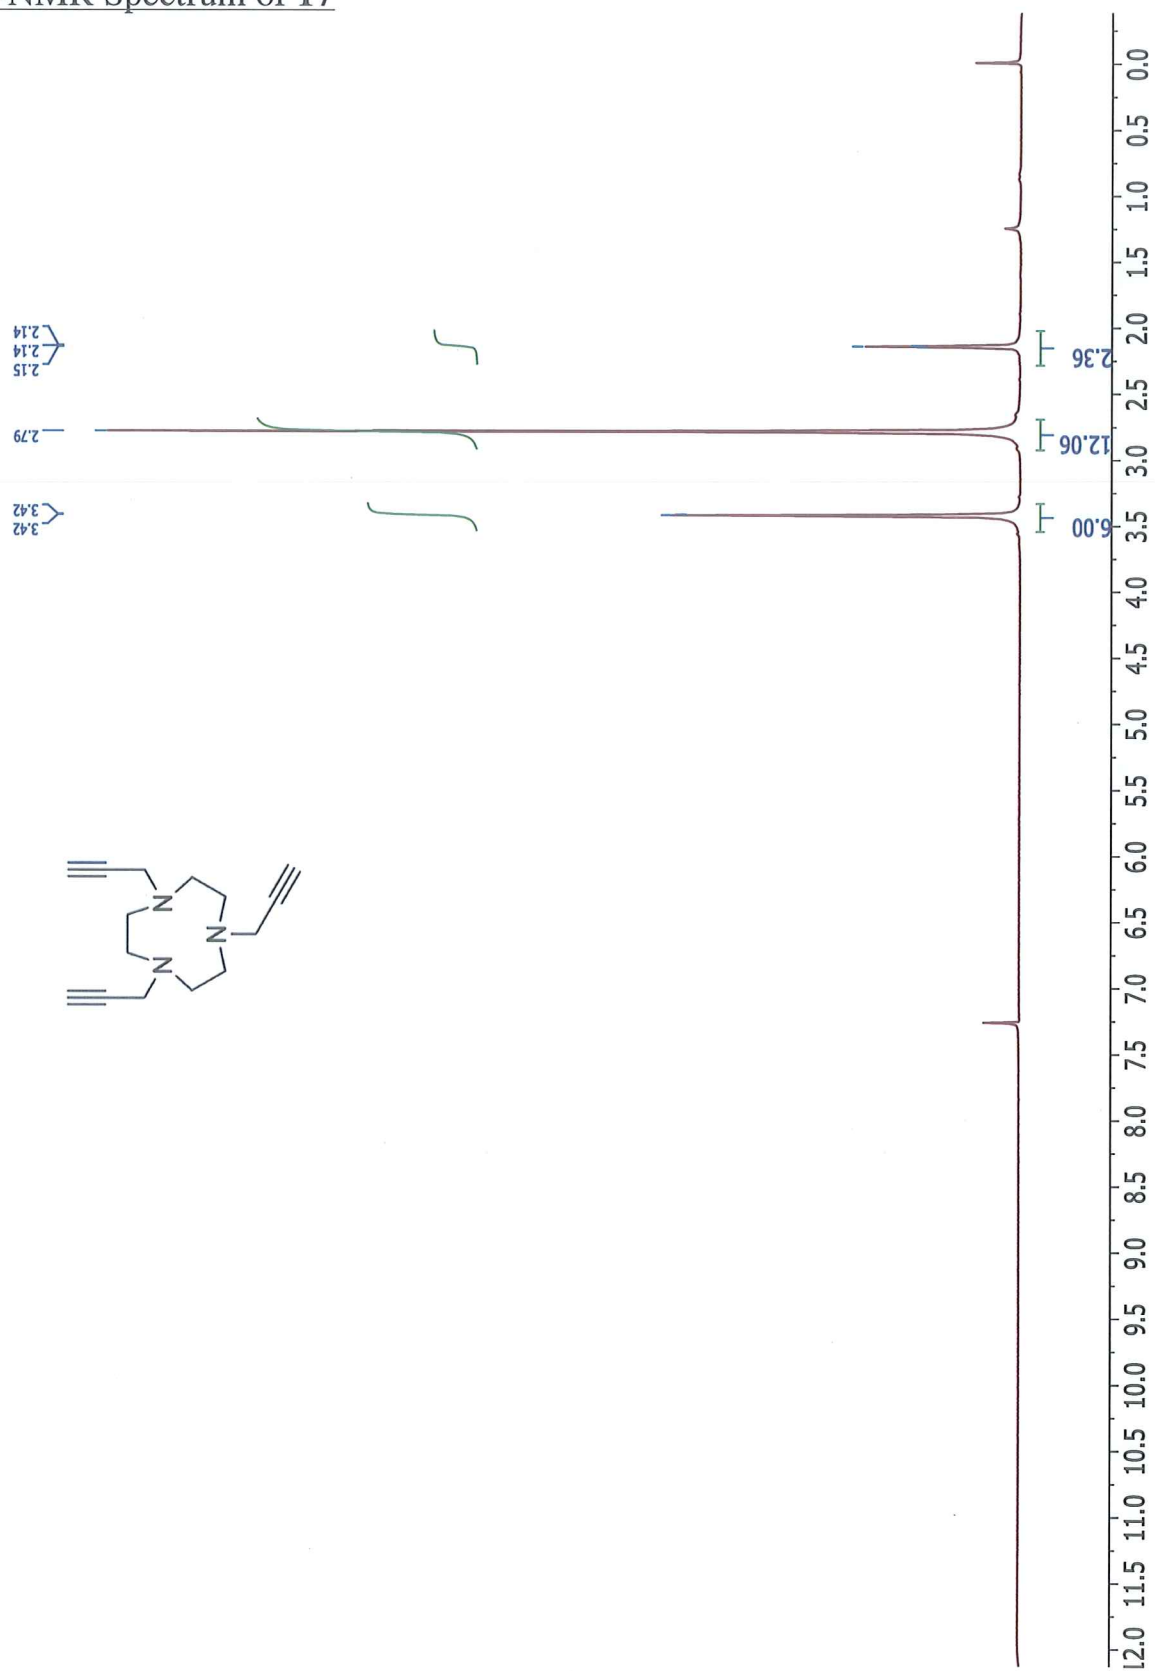



$^{13}\text{C}$ -NMR Spectrum of 17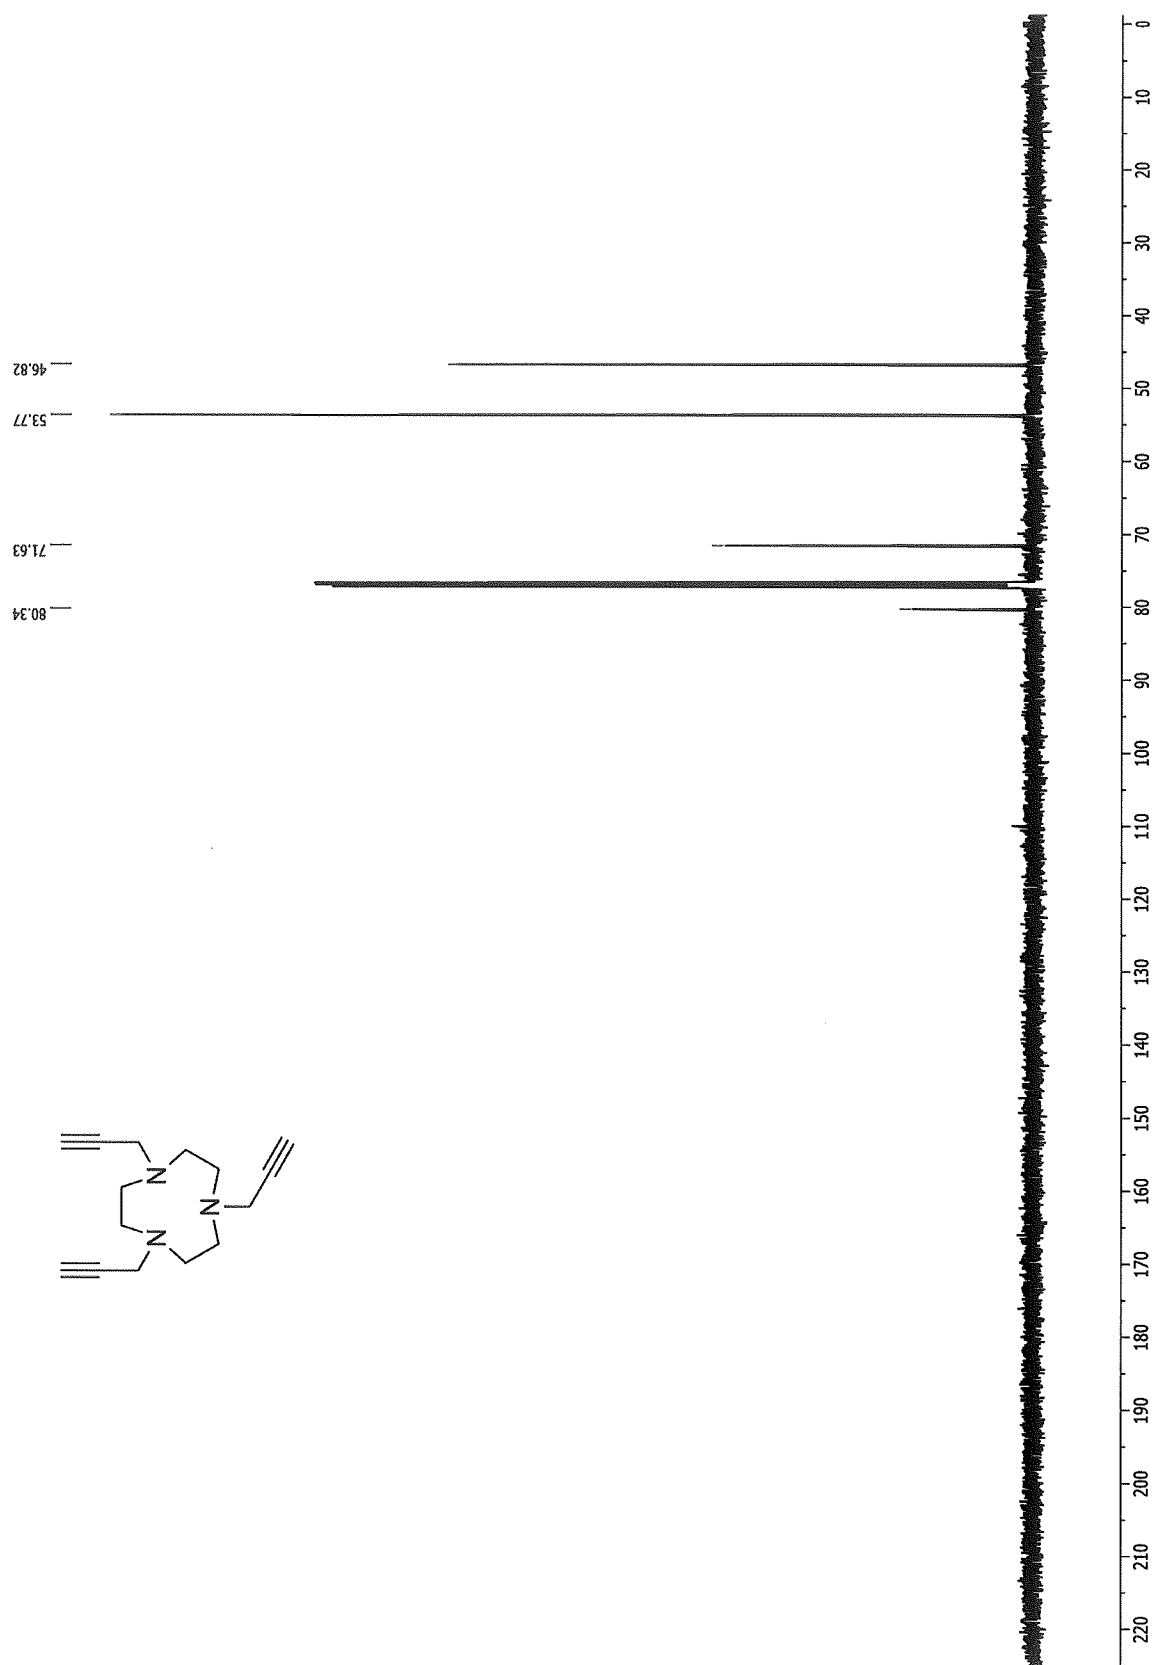

## HPLC Chromatogram of 18

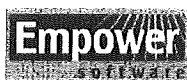

## Dual Channel Summary

Reported by User: System

Project Name: BIO5\_HPLC1

## SAMPLE INFORMATION

|                   |                    |                     |                              |
|-------------------|--------------------|---------------------|------------------------------|
| Sample Name:      | esh B3P50          | Acquired By:        | System                       |
| Sample Type:      | Unknown            | Date Acquired:      | 1/9/2014 5:43:06 PM MST      |
| Vial:             | 75                 | Acq. Method Set:    | 10_90B_in                    |
| Injection #:      | 1                  | Date Processed:     | 1/10/2014 1:33:22 PM MST,    |
| Injection Volume: | 10.00 ul           | Processing Method   | Peptide_general              |
| Run Time:         | 45.0 Minutes       | Channel Name:       | 2487Channel 1, 2487Channel 2 |
| Sample Set Name   | Prime_Run_07_19_07 | Proc. Chnl. Descr.: | 220nm, 280nm                 |

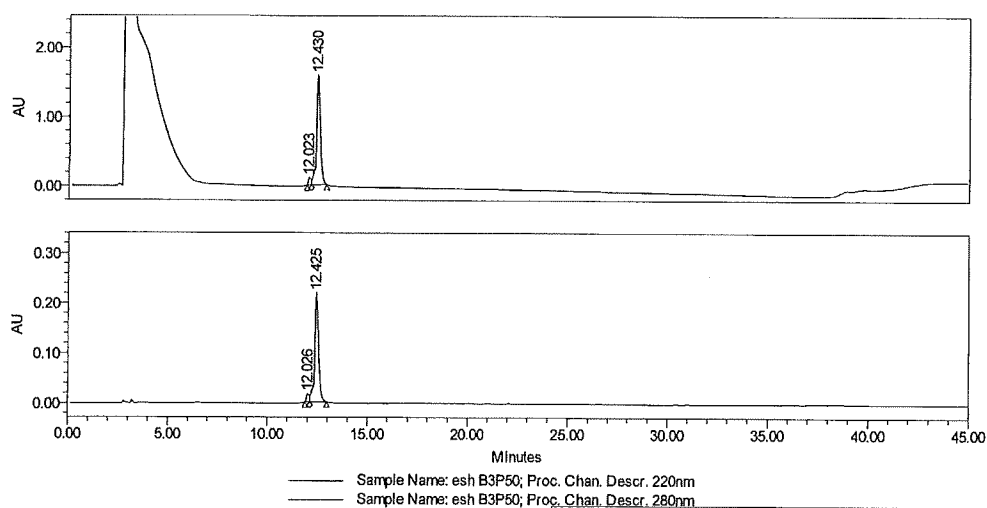

Channel 220 nm  
Channel: 2487Channel 1

|   | RT     | Area<br>( $\mu\text{V}\cdot\text{sec}$ ) | % Area | Channel       |
|---|--------|------------------------------------------|--------|---------------|
| 1 | 12.430 | 2.14e+007                                | 95.88  | 2487Channel 1 |

Channel 280 nm  
Channel: 2487Channel 2

|   | RT     | Area<br>( $\mu\text{V}\cdot\text{sec}$ ) | % Area | Channel       |
|---|--------|------------------------------------------|--------|---------------|
| 1 | 12.425 | 2.94e+006                                | 95.14  | 2487Channel 2 |

NOTES:

### **Molecular Dynamics Studies**

To model the molecular orientations of the MSH(4) ligands of compounds **6**, **14c**, **16c**, and **18** at or near physiologic conditions and temperatures, molecular dynamics simulations were carried out using MOE2013.08 (Chemical Computing Group, Inc., Montreal) and programs therein. The AMBER 99 force field was used. Before starting the dynamics simulation, each molecule was first built and energy minimized, solvated in a water shell (between 4800 and 5900 waters per molecule), then re-minimized to relax unfavorable contacts. In each case, the system was then heated from 300 to 310 K over 100 ps. Following equilibration for 100 ps, the production stage continued for 2 ns, with trajectories recorded every 0.5 ps starting with the heating stage. The lowest energy conformation of each molecule observed during its MD run is depicted in Figure 3 of the article.

### **Protein Assay for Fluorescence Normalization**

The dissolved protein content in each of the micro-centrifuge tubes from the bioassays was quantified using the Bio-Rad protein assay.<sup>1</sup> The manufacturer-supplied lyophilized BSA standard was reconstituted in DI water to provide a standard solution with a concentration of 1.4 mg/mL. By serial dilution, five solutions (0.50, 0.25, 0.12, 0.080, and 0.050 mg/mL) of BSA were prepared. Dye reagent was prepared by dilution of 25 mL of the dye concentrate (Bio-Rad) into 100 mL of DI water, followed by filtration through a Whatman #1 filter. To quantify protein content in each assay sample,  $3 \times 10 \mu\text{L}$  of each supernatant solution from the micro-centrifuge tubes was transferred to a 96 well clear bottomed plate (Corning Inc., 353072, Falcon multiwell flat-bottom plates with lids, sterile). Control solutions were also placed in the same plate ( $3 \times 10 \mu\text{L}$  of each BSA concentration) along with a blank (DI water,  $3 \times 10 \mu\text{L}$ ). The reagent dye solution was then added to all wells using a multi-channel pipette at  $200 \mu\text{L}$  per well. The sample and the reagent in the well were mixed by repeated (5 $\times$ ) depressing of the pipette plunger. After mixing, the plate was left at rt for 10-15 min, and the absorbance measured at 595 nm. Absorbance values from the standard solutions were used to construct a calibration curve (Figure S1).

---

<sup>1</sup> <http://www.bio-rad.com/webroot/web/pdf/lsr/literature/LIT33.pdf>

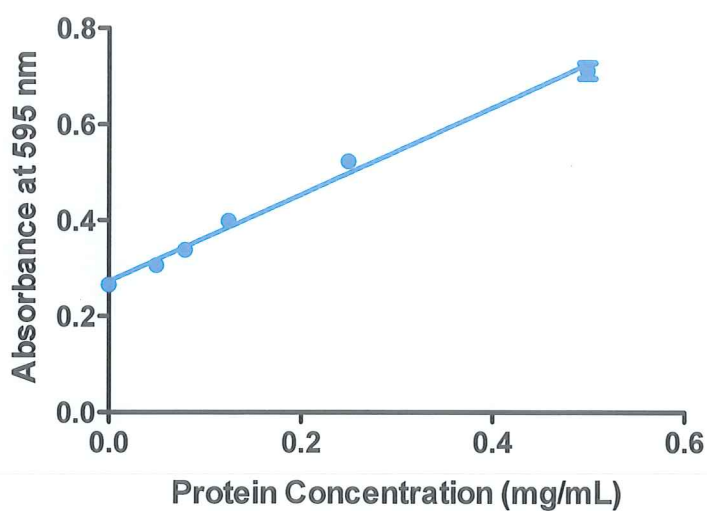

**Figure S1.** Representative protein assay calibration curve;  $y = 0.9038x + 0.2725$  ( $R^2 = 0.99$ ).

Using the protein content calibration curves, the dissolved protein content of each of the samples was determined. The observed fluorescence value of each sample (i.e. data point) was normalized to the dissolved protein content according to the following equation. Then, competition binding curves (Figure S2) were constructed using the normalized data values.

$$F/\text{mg protein} = \frac{F}{100 \mu\text{L}} \times \frac{1000 \mu\text{L}}{1 \text{ mL}} \times \frac{1}{[\text{protein}] \text{ mg/mL}}$$

where  $F$  = measured fluorescence

$[\text{protein}]$  = concentration of protein

### Fluorescence Normalized Competition Binding Curves

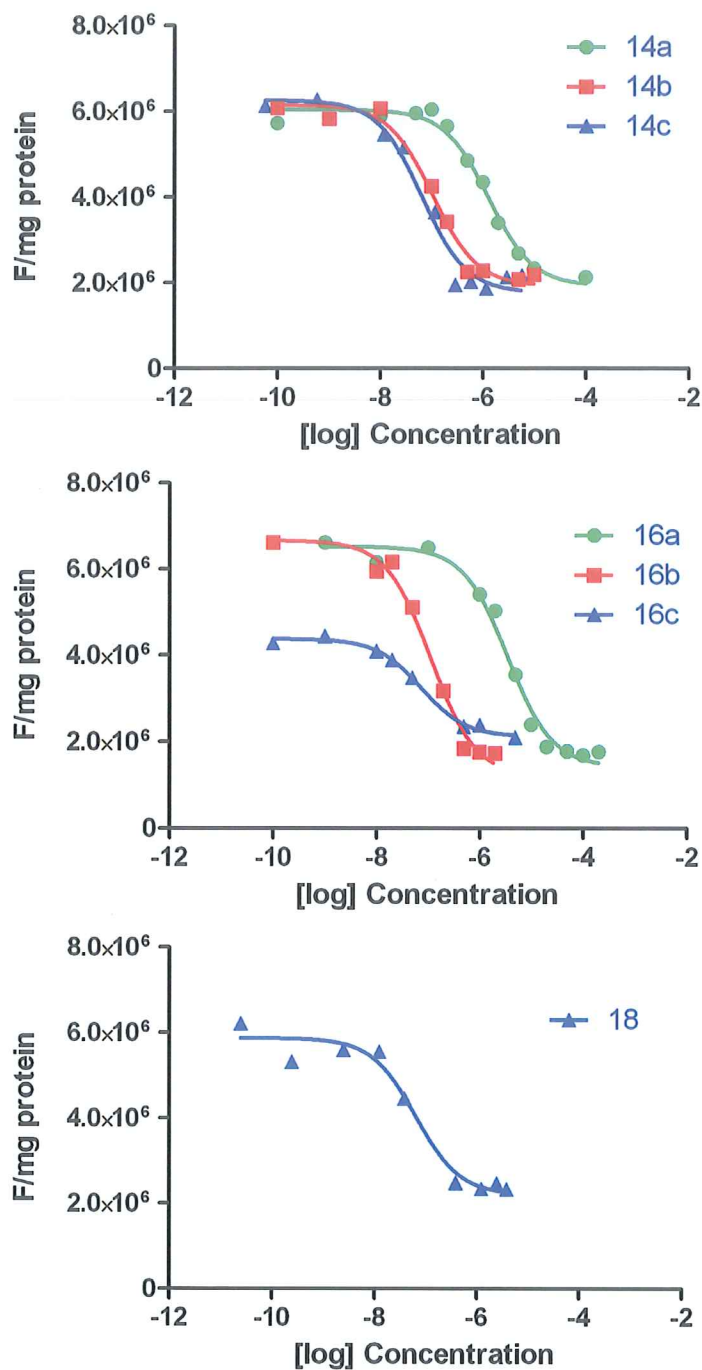

**Figure S2.** Competition binding curves (normalized to the protein content) for the compounds **14a-c** (*top*), **16a-c** (*middle*), and **18** (*bottom*) against probe **19** (20 nM) generated using the six-well plate assay method. Control compounds **12a** and **15a** were not competitive inhibitors of **19** over the concentration ranges tested.

### **$K_i$ Values Based on Fluorescence Normalized Competition Binding Curves**

**Table S1.** Results of competitive binding assays based on the fluorescence normalized data.<sup>a</sup>

| Compound   | $K_i \pm \text{SEM}$ (nM) <sup>b</sup> | Relative Potency <sup>c</sup> |
|------------|----------------------------------------|-------------------------------|
| <b>12a</b> | nb <sup>d</sup>                        | Not applicable                |
| <b>14a</b> | 600 $\pm$ 50                           | 1                             |
| <b>14b</b> | 64 $\pm$ 11                            | 9                             |
| <b>14c</b> | 45 $\pm$ 9                             | 13                            |
| <b>15a</b> | nb <sup>d</sup>                        | Not applicable                |
| <b>16a</b> | 1730 $\pm$ 200                         | 1                             |
| <b>16b</b> | 72 $\pm$ 6                             | 24                            |
| <b>16c</b> | 40 $\pm$ 8                             | 43                            |
| <b>18</b>  | 29 $\pm$ 1                             | Not applicable                |

<sup>a</sup>Competition experiments were carried out against probe **19** ( $K_d$  = 21 nM, [19] = 20 nM) using HEK293 cells overexpressing hMC4R and CCK2R.

<sup>b</sup>SEM = standard error of the mean; n = 5 independent determinations.

<sup>c</sup>Relative potency compared to the monovalent MSH(4) construct with the same scaffold core.

<sup>d</sup>nb = no competitive binding observed.

## Data Analysis for the Binding Assays

Biological data analysis was performed using GraphPad Prism software (version 5.04) using the following specific analysis parameters.

### **Saturation Binding Data**

The top graphs in Figure 2 were generated from the binding assay data using nonlinear regression analysis and fitted to the “One-site Total and Nonspecific Binding” equation.

$$\text{Specific} = B_{\max} * X / (X + K_d) \quad (\text{Equation S1})$$

$$\text{Nonspecific} = \text{NS} * X + \text{Background} \quad (\text{Equation S2})$$

For Total Binding:  $Y = \text{specific} + \text{nonspecific}$

For Nonspecific binding:  $Y = \text{nonspecific}$

Where

- $B_{\max}$  is the maximum specific binding in the same units as Y.
- $K_d$  is the equilibrium binding constant, in the same units as X. It is the labeled ligand concentration needed to achieve a half-maximum binding at equilibrium.
- NS is the slope of nonspecific binding in Y units divided by X units.
- Background is the amount of nonspecific binding with no added labeled ligand. This represents counter background. If the counter automatically subtracts off the background signal, Background can be constrained to a constant value of zero.

The bottom graph in Figure 2 was generated using nonlinear regression analysis and fitted to the “One site - Specific Binding with Hill Slope” equation.

$$Y = B_{\max} * X^h / (K_d^h + X^h) \quad (\text{Equation S3})$$

Where;

- $h$  = Hill slope.

### **Competitive Binding Data**

Competitive binding data were analyzed using nonlinear regression analysis and fitted to the “One site - Fit  $K_i$ ” equation.

$$\log EC_{50} = \log (10^{\log K_i * (1 + [L] / [\text{Hot } K_d])}) \quad (\text{Equation S4})$$

$$Y = \text{Bottom} + (\text{Top} - \text{Bottom}) / (1 + 10^{(X - \log EC_{50})}) \quad (\text{Equation S5})$$

Where;

- Top and Bottom are plateaus in the units of Y axis.
- $K_i$  is the molar equilibrium dissociation constant of the unlabeled ligand.
- $[L]$  is the concentration of labeled ligand in nM. Here  $[L] = 20$  nM
- $[\text{Hot } K_d]$  is the equilibrium dissociation constant of the labeled ligand in nM. Here  $[\text{Hot } K_d] = 21$  nM.
